# Supplementary material for: A DNA microarray survey of gene expression in normal human tissues
Source: PubMed Central journal article supplement (PMC1088941; doi:10.1186/gb-2005-6-3-r22), 2005-02-14

# a. Brain

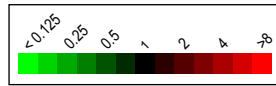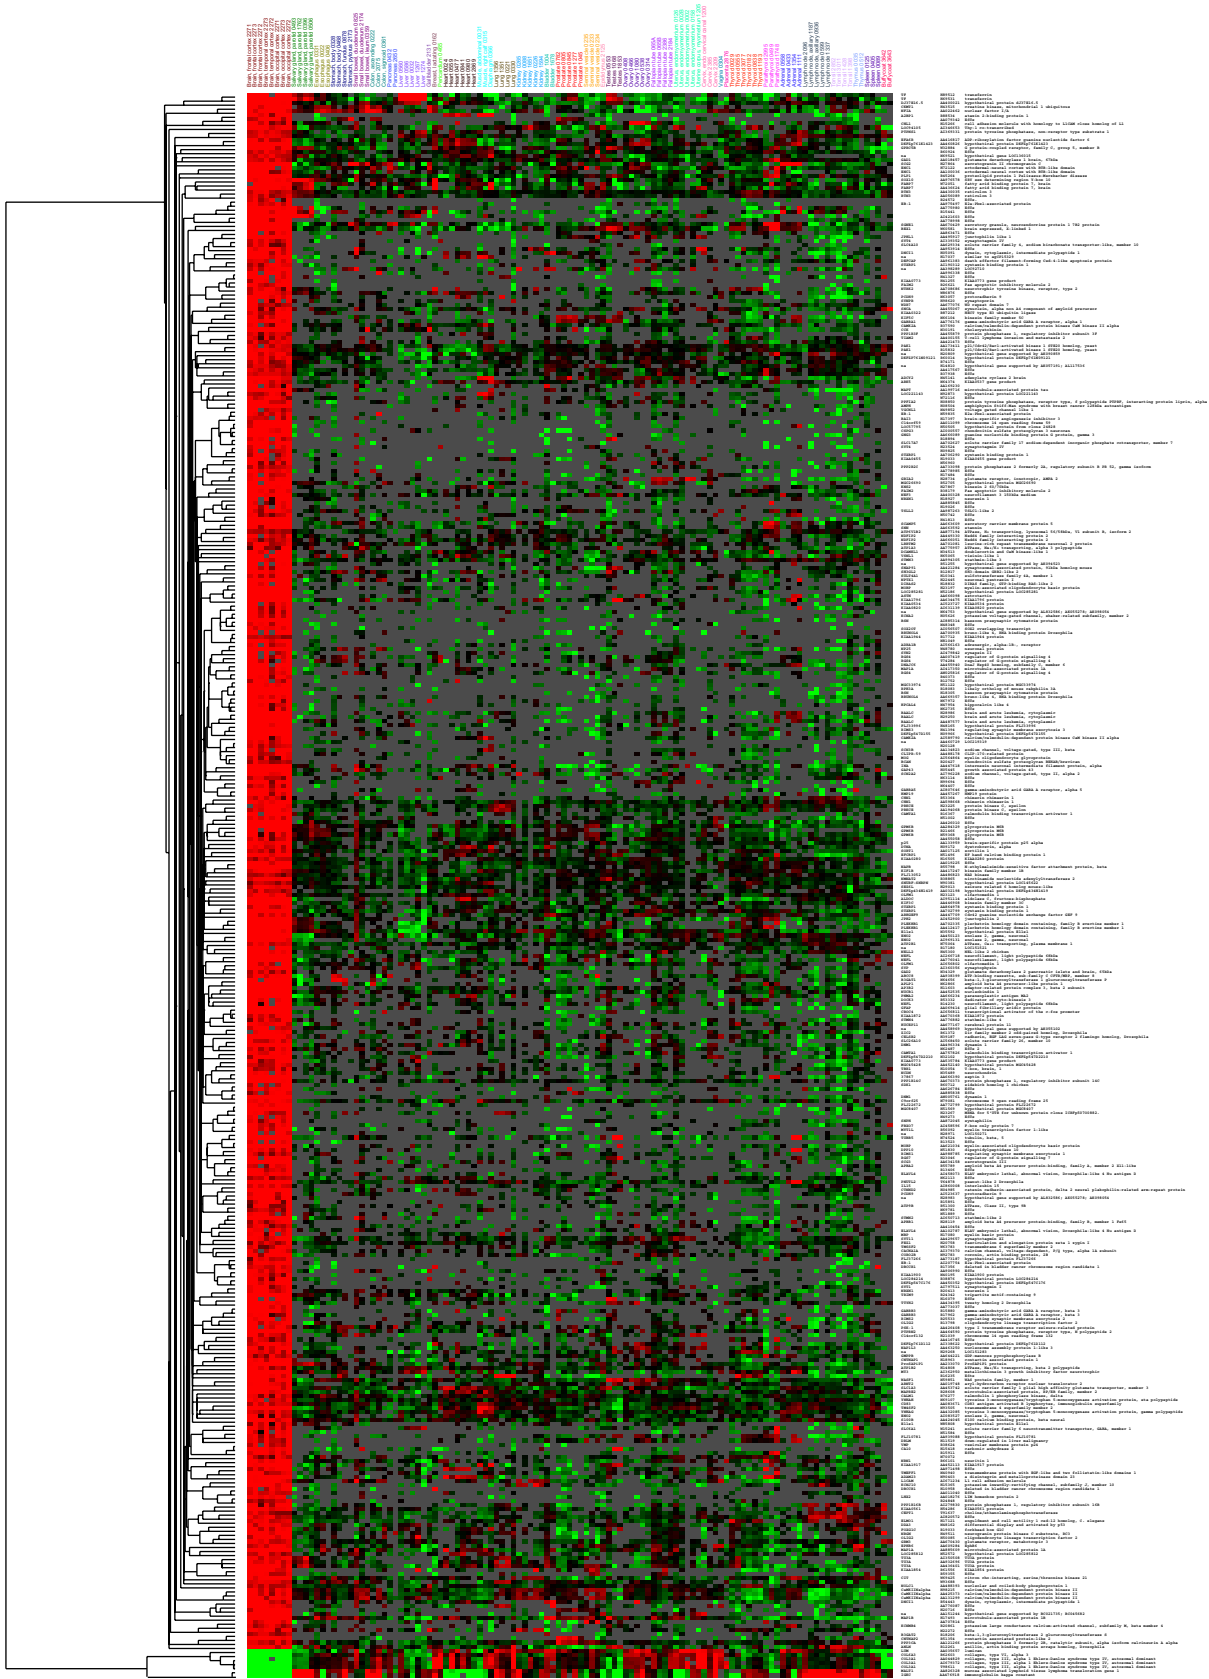

# b. Salivary gland

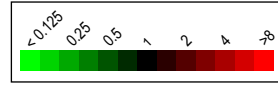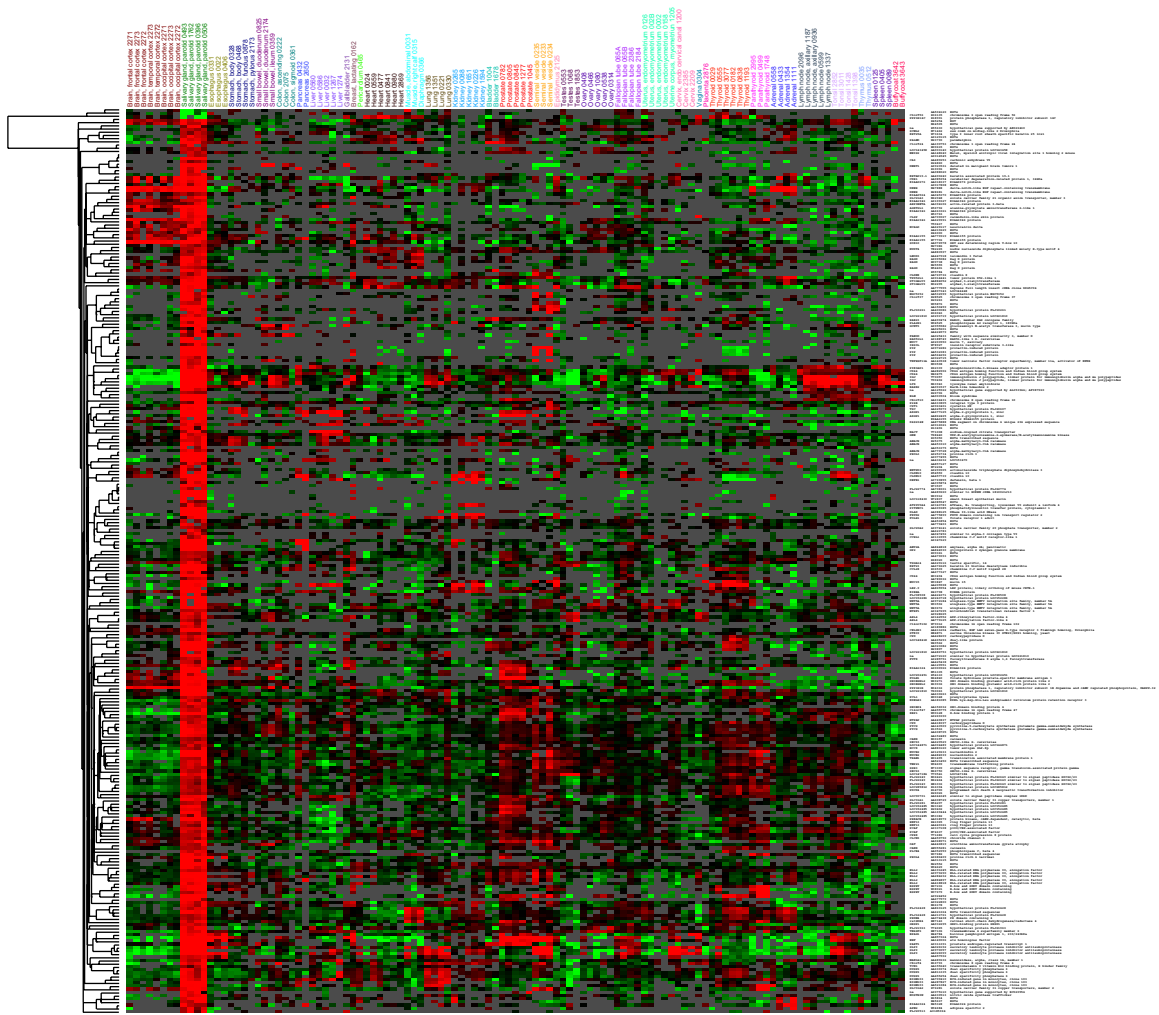

# c. Esophagus

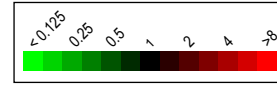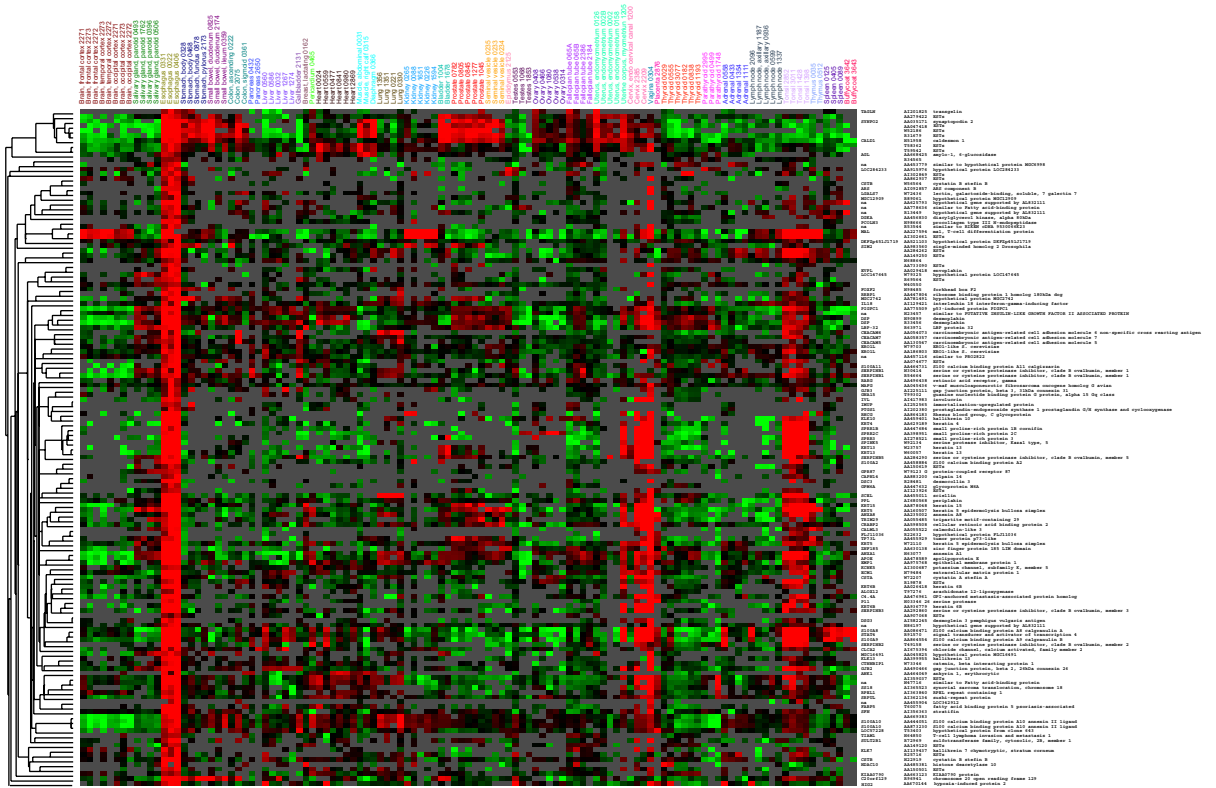

# d. Stomach

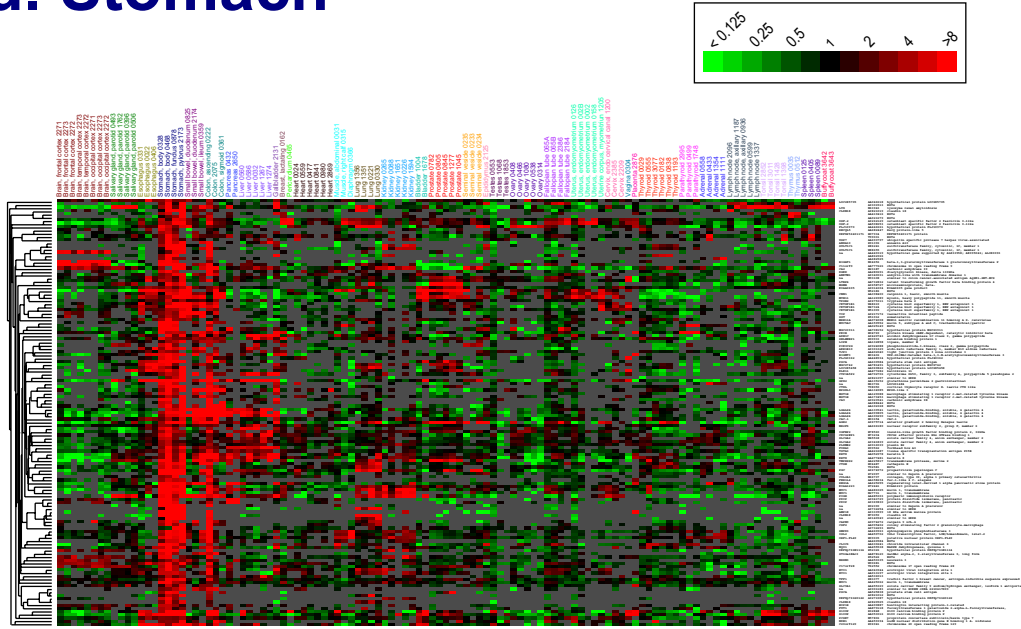

## e. Small bowel

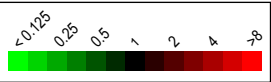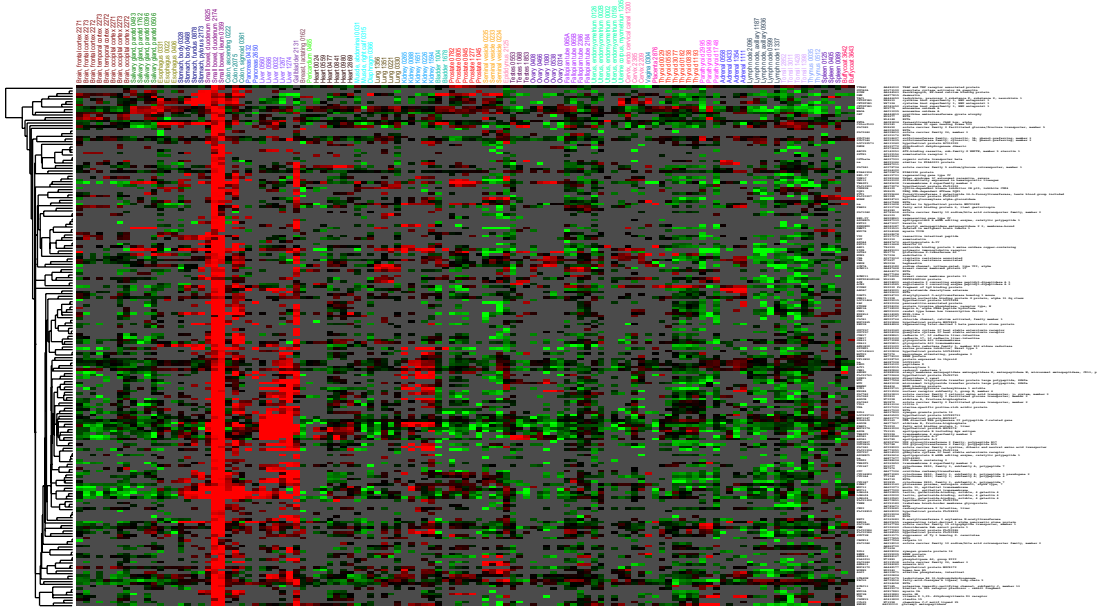



# g. Pancreas

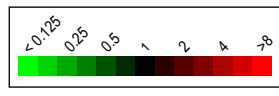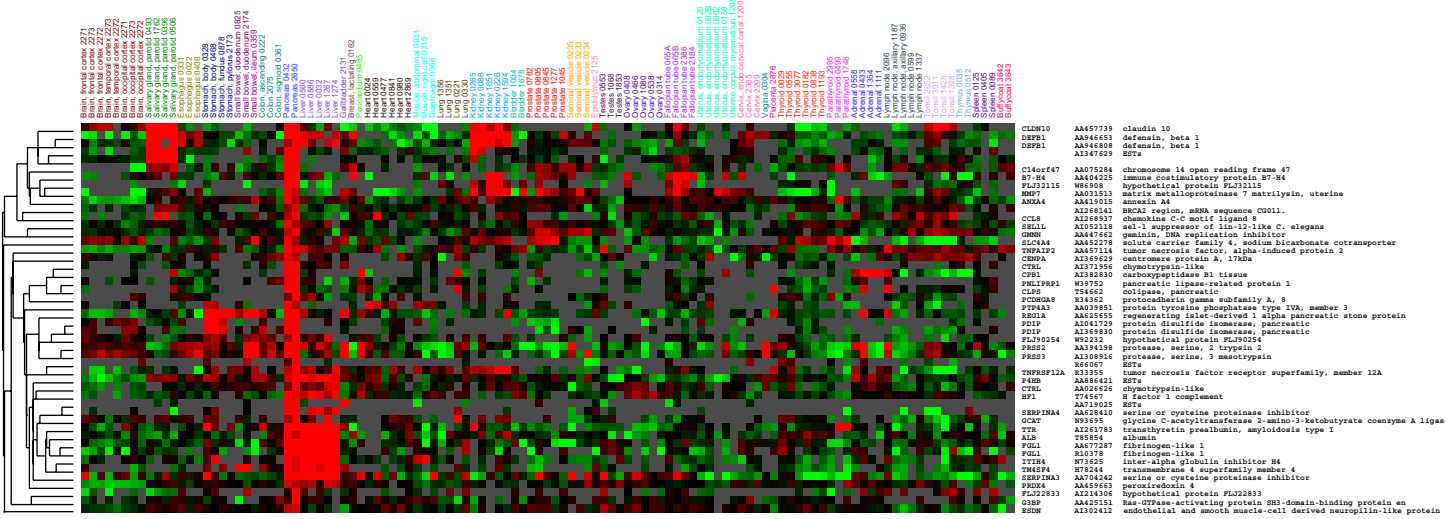

# h. Liver

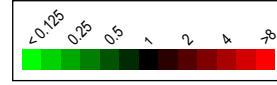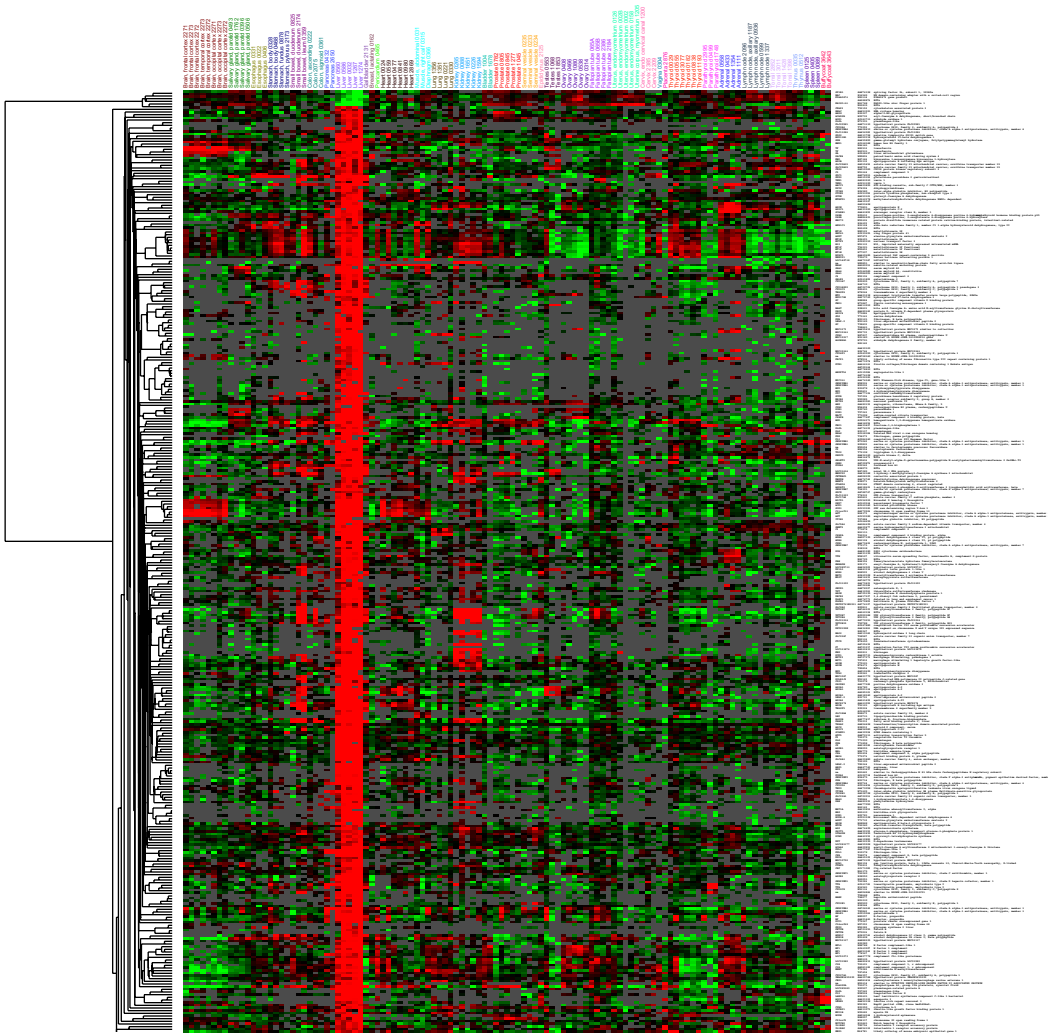



# i. Heart

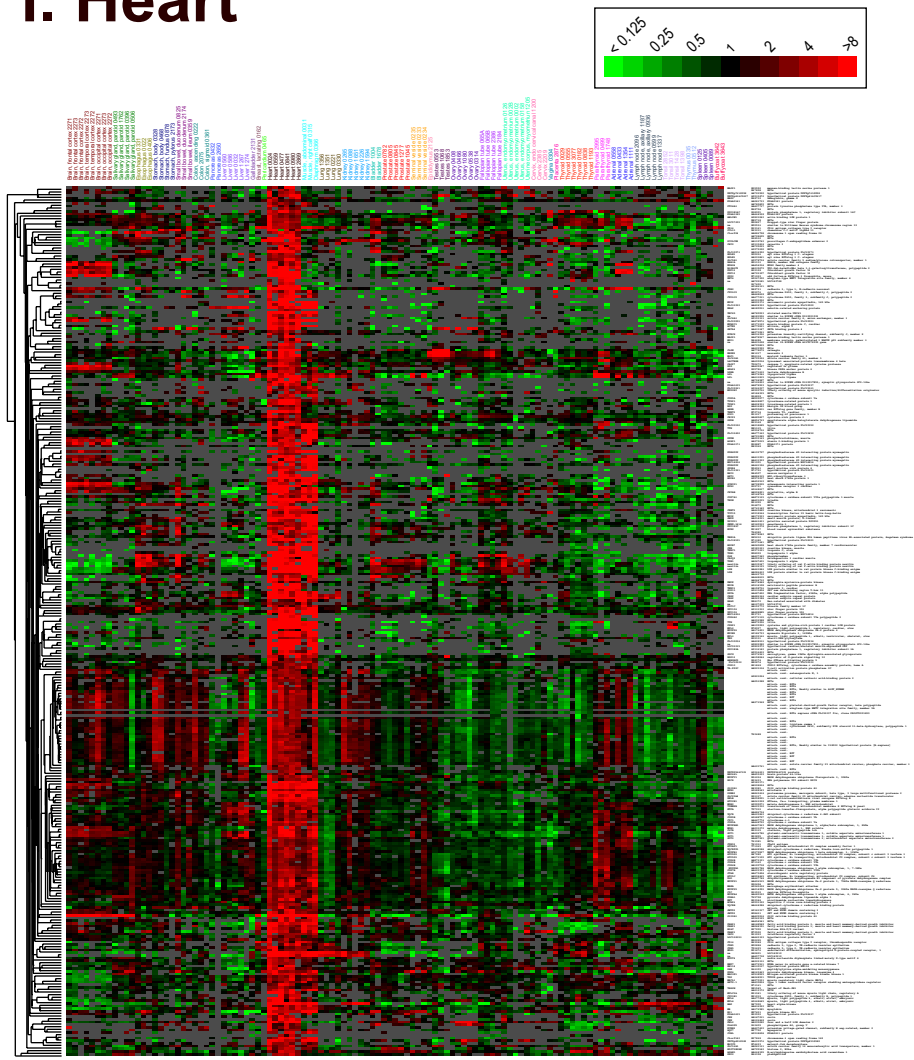

# j. Skeletal muscle

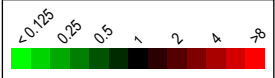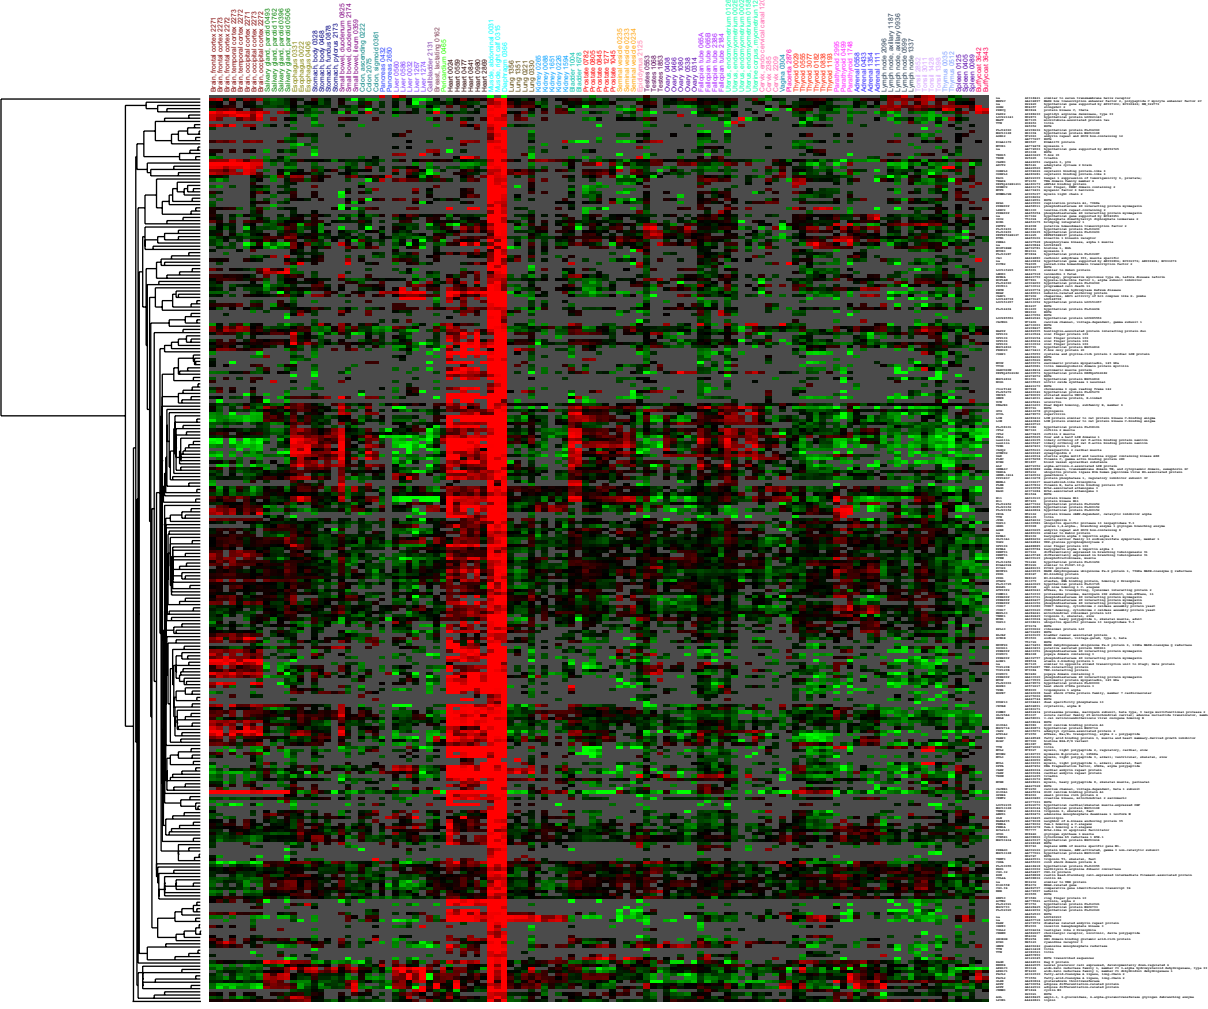

# k. Lung

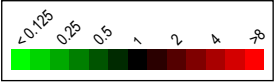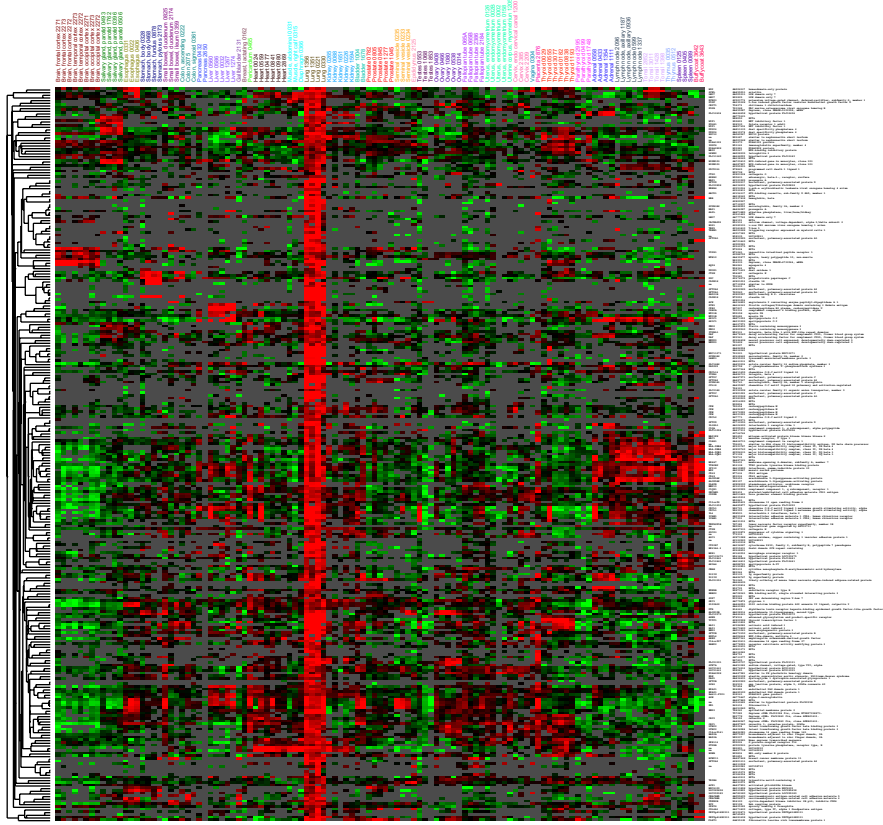

# I. Kidney

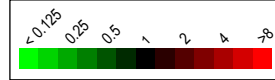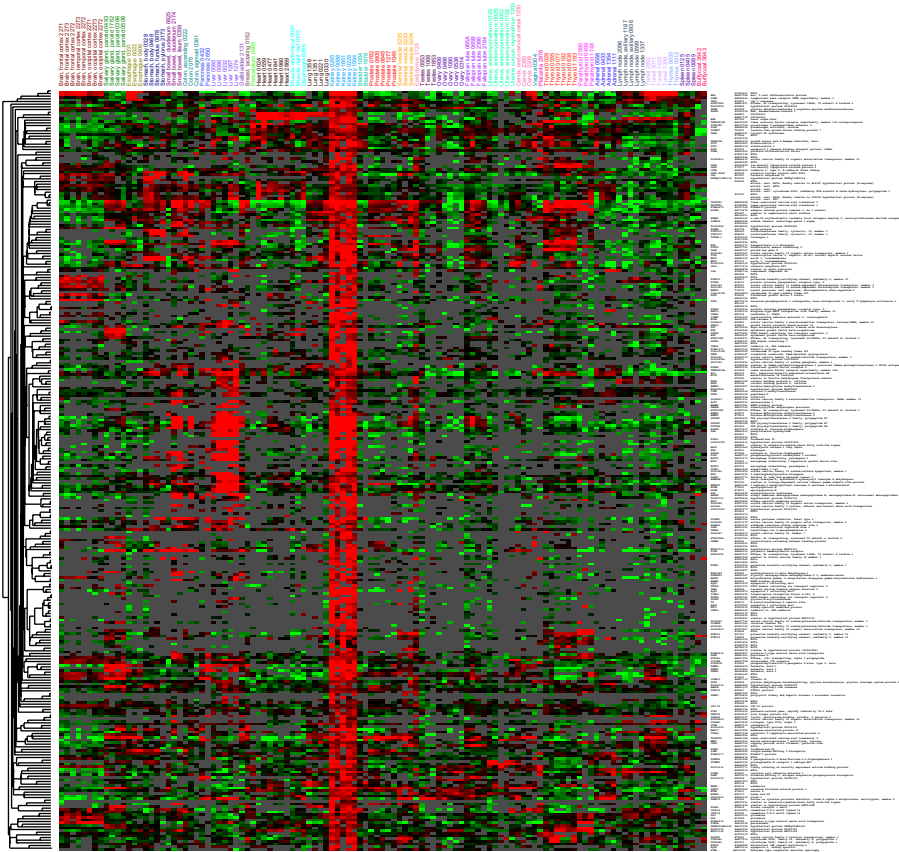





# o. Seminal vesicle

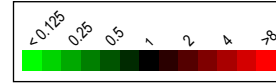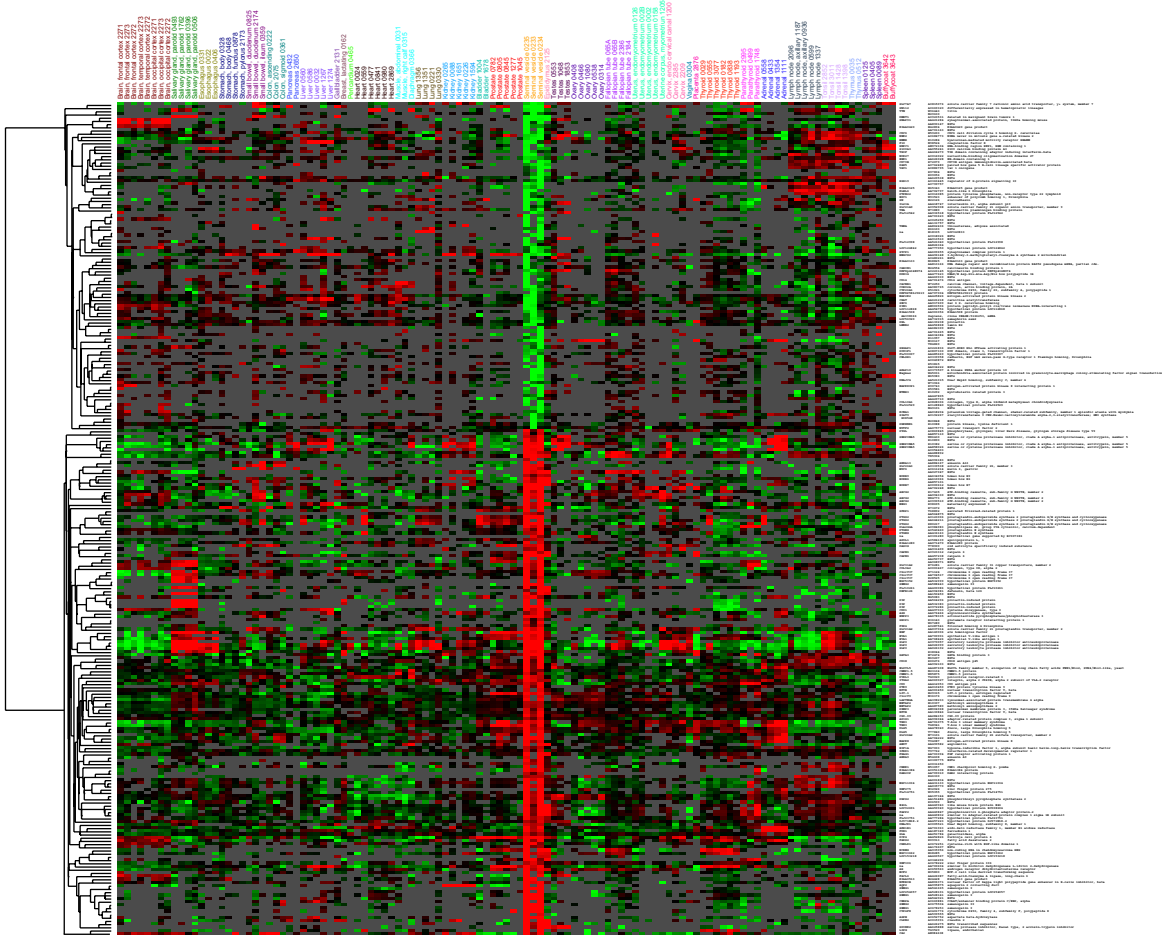

# p. Testis

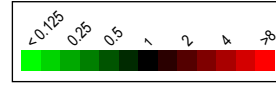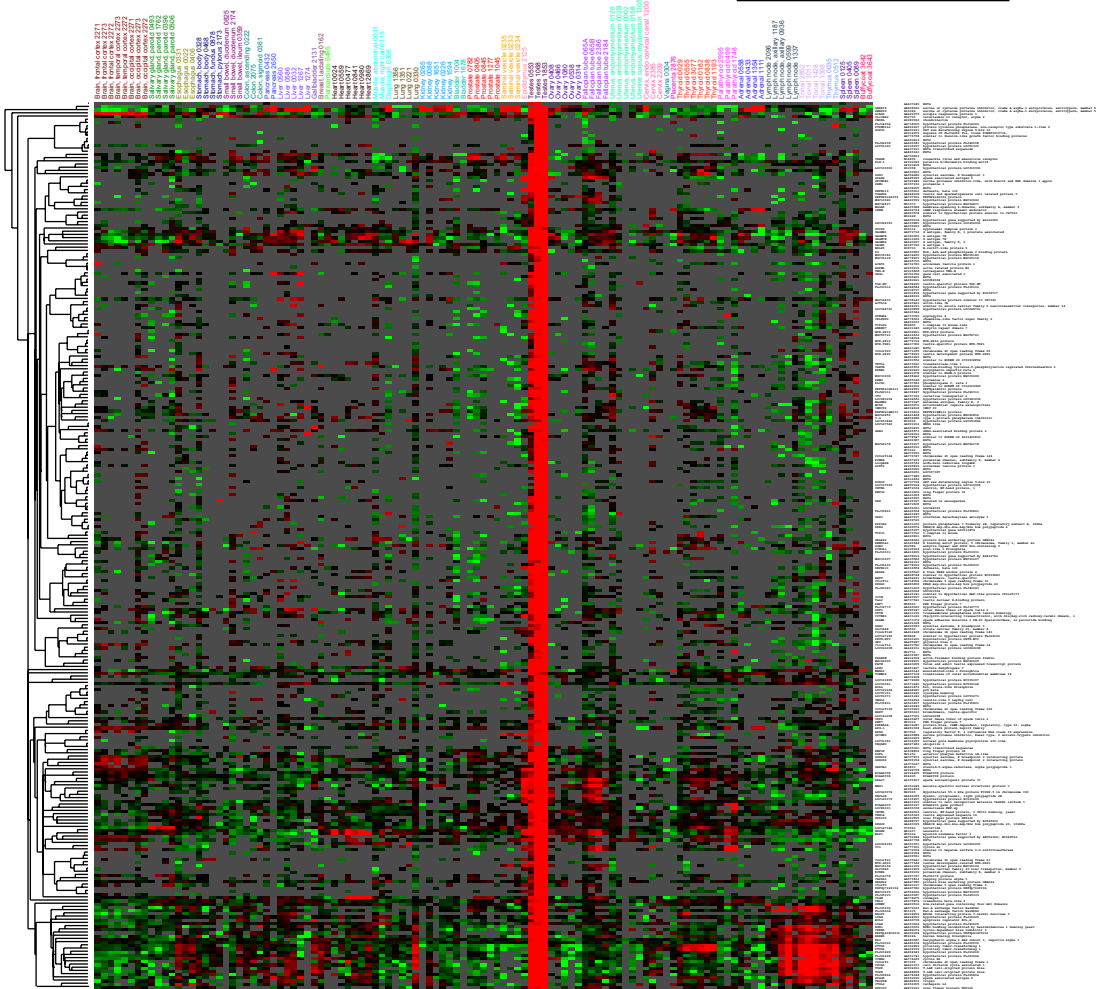



# q. Ovary

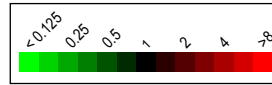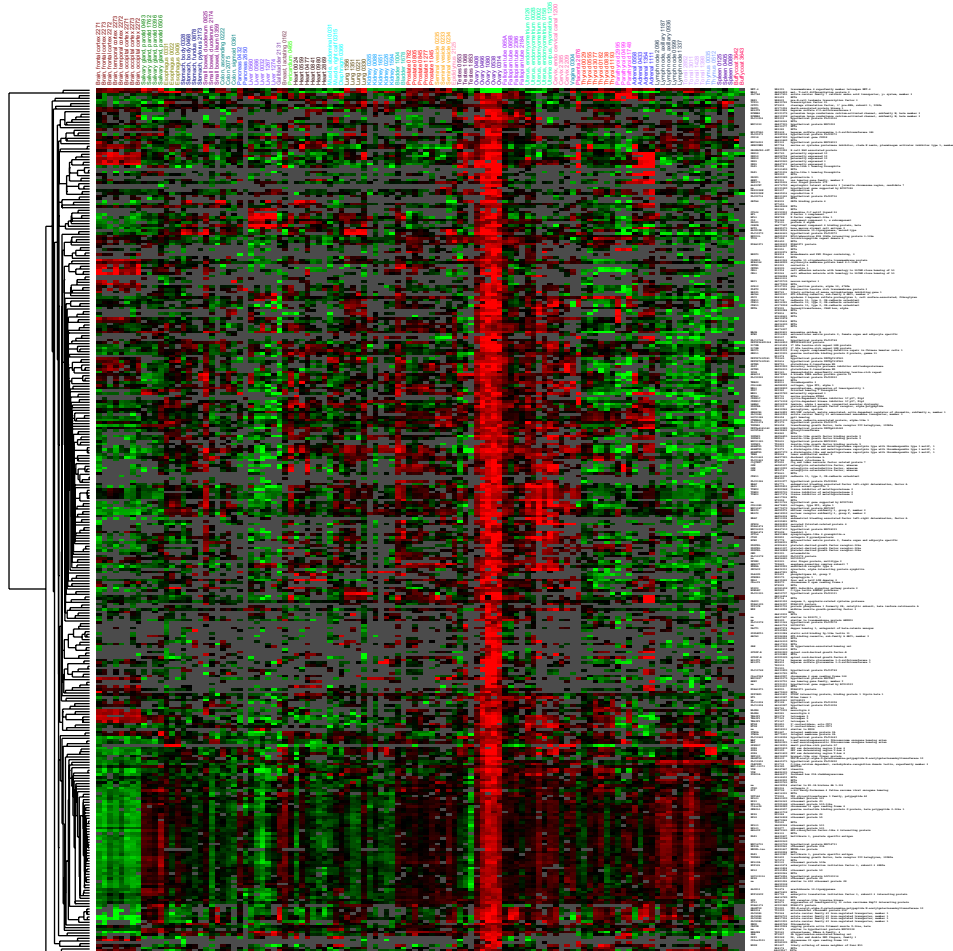

# r. Fallopian tube

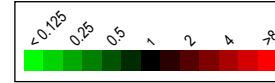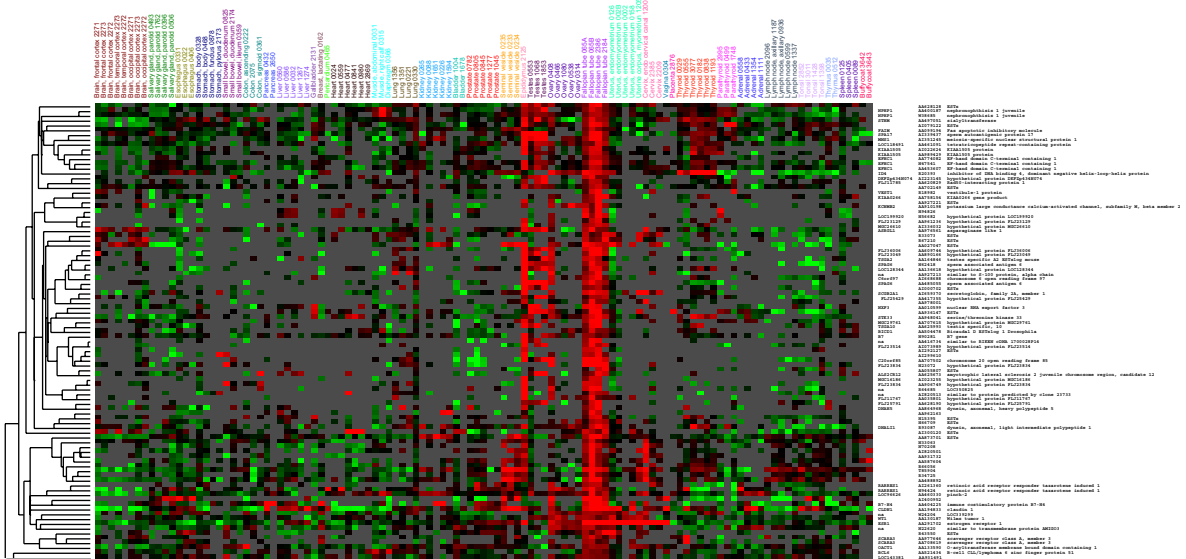





# u. Thyroid

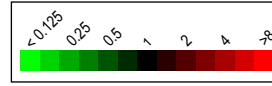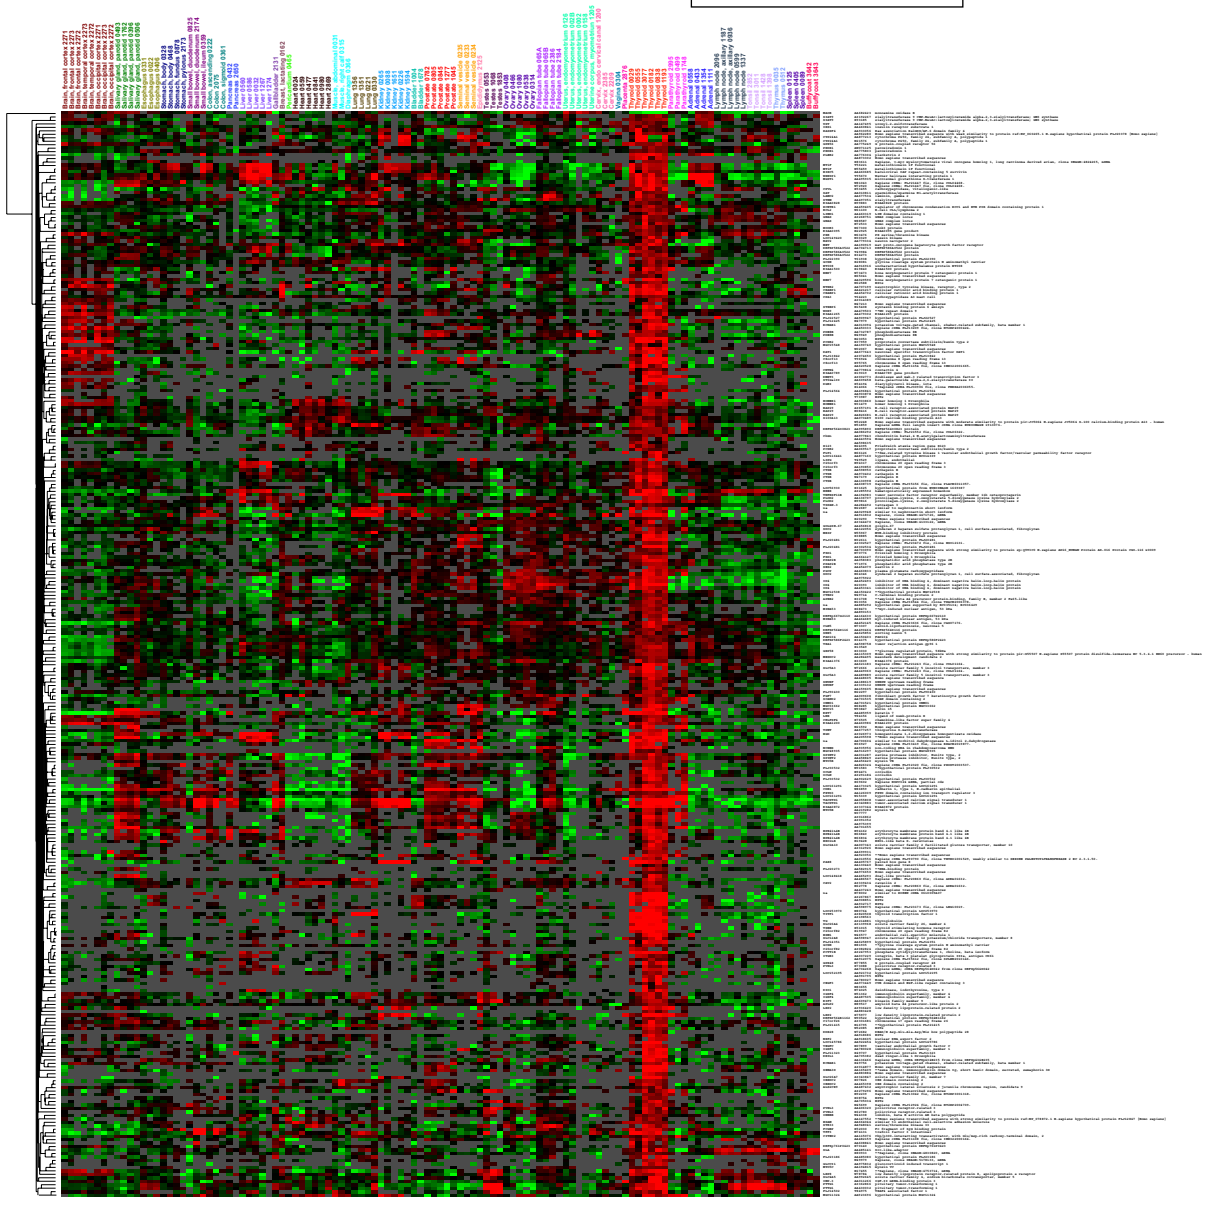

# v. Parathyroid

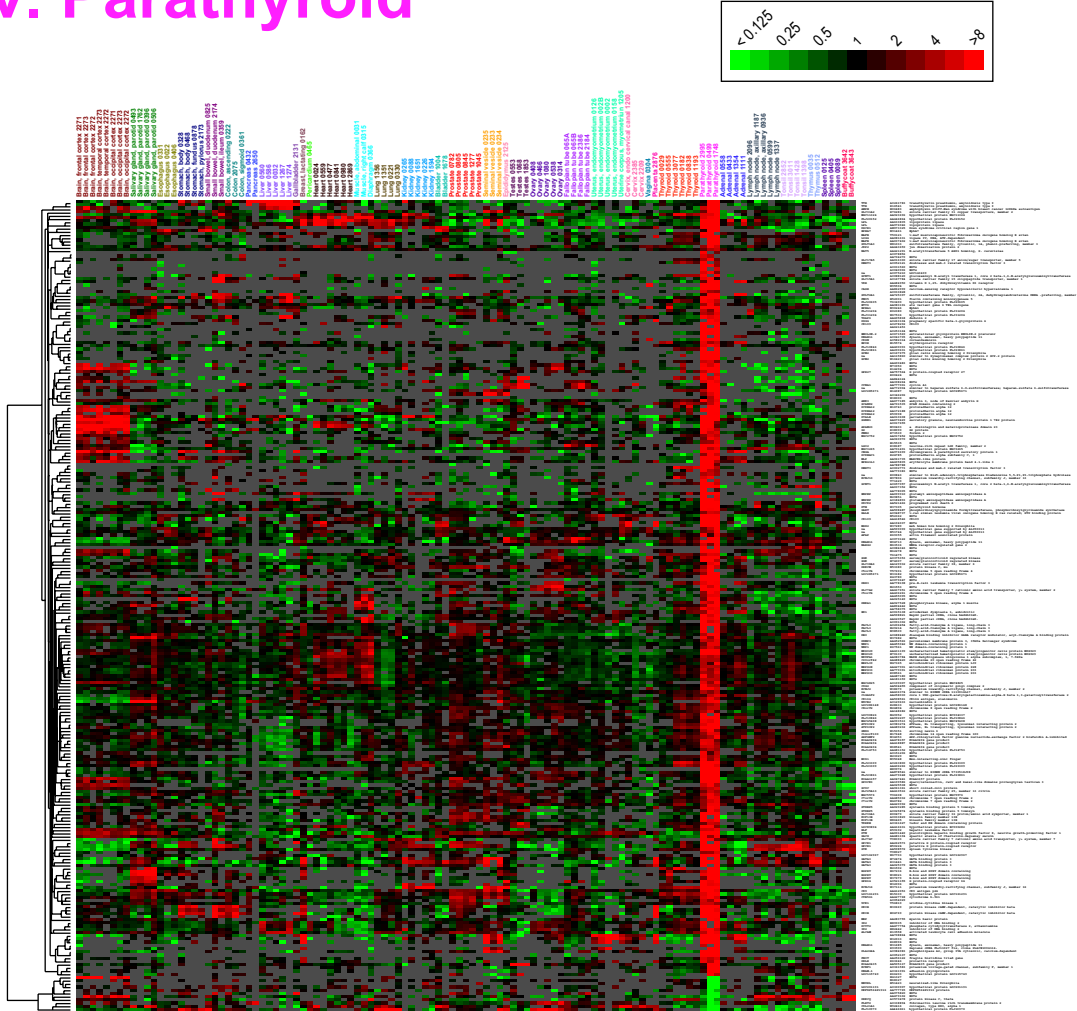

# w. Adrenal

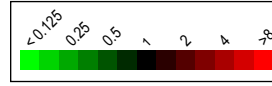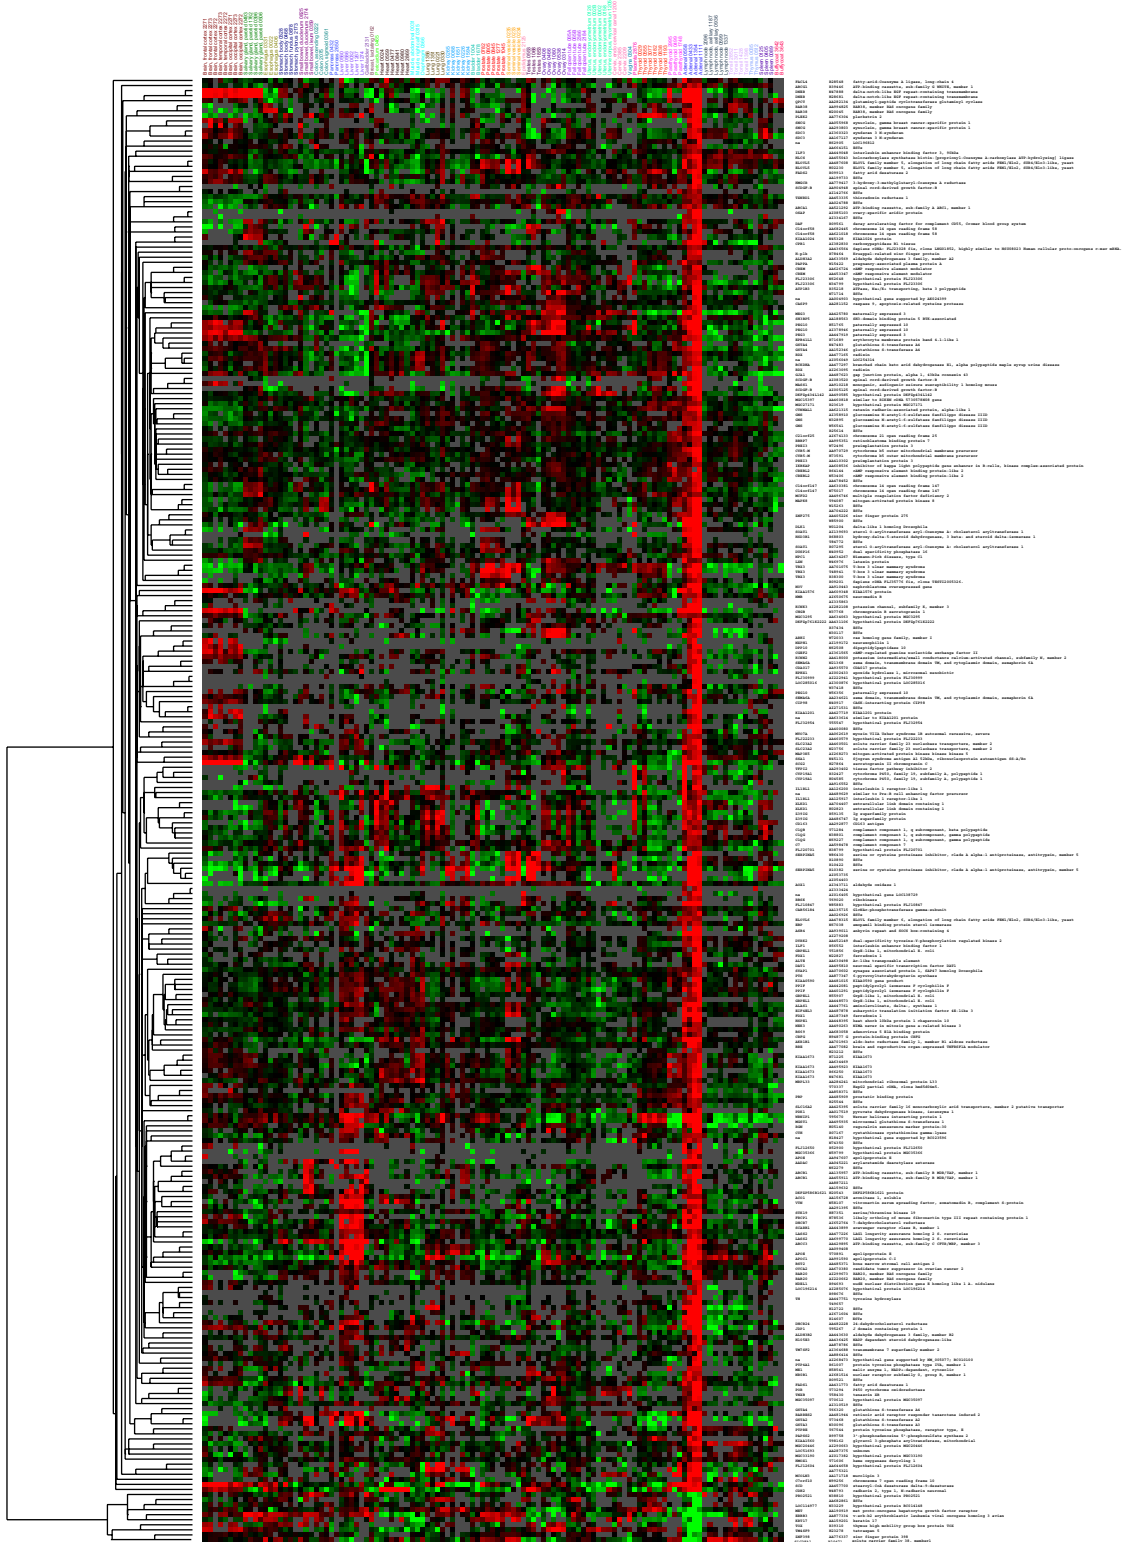

# x. Lymph node

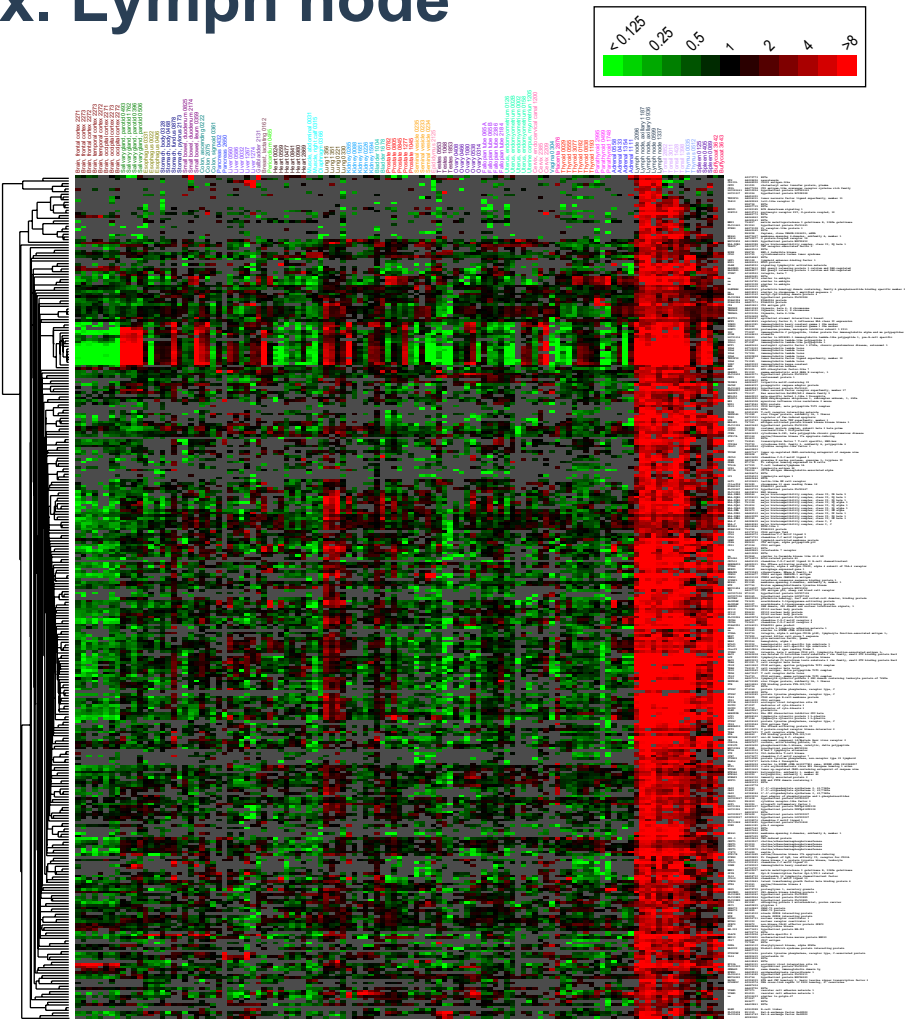



# y. Tonsil

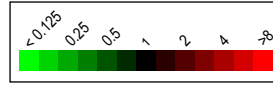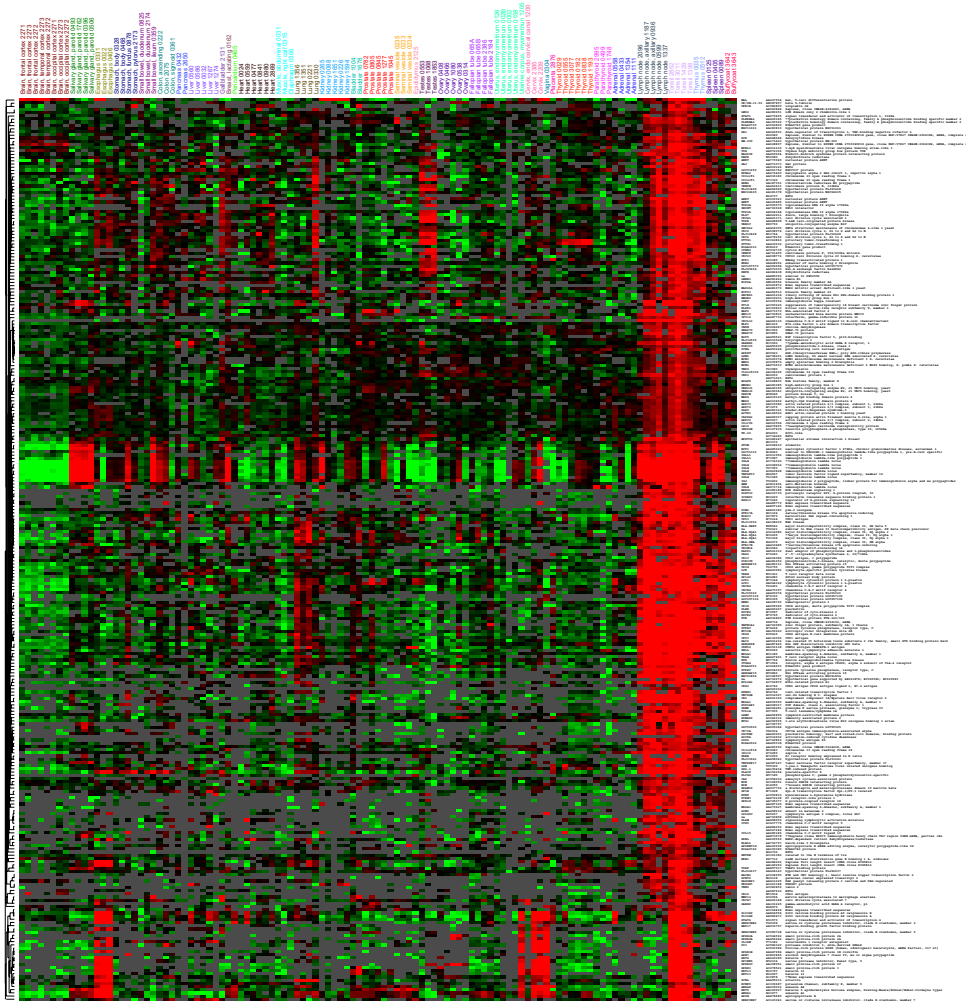

# z. Thymus

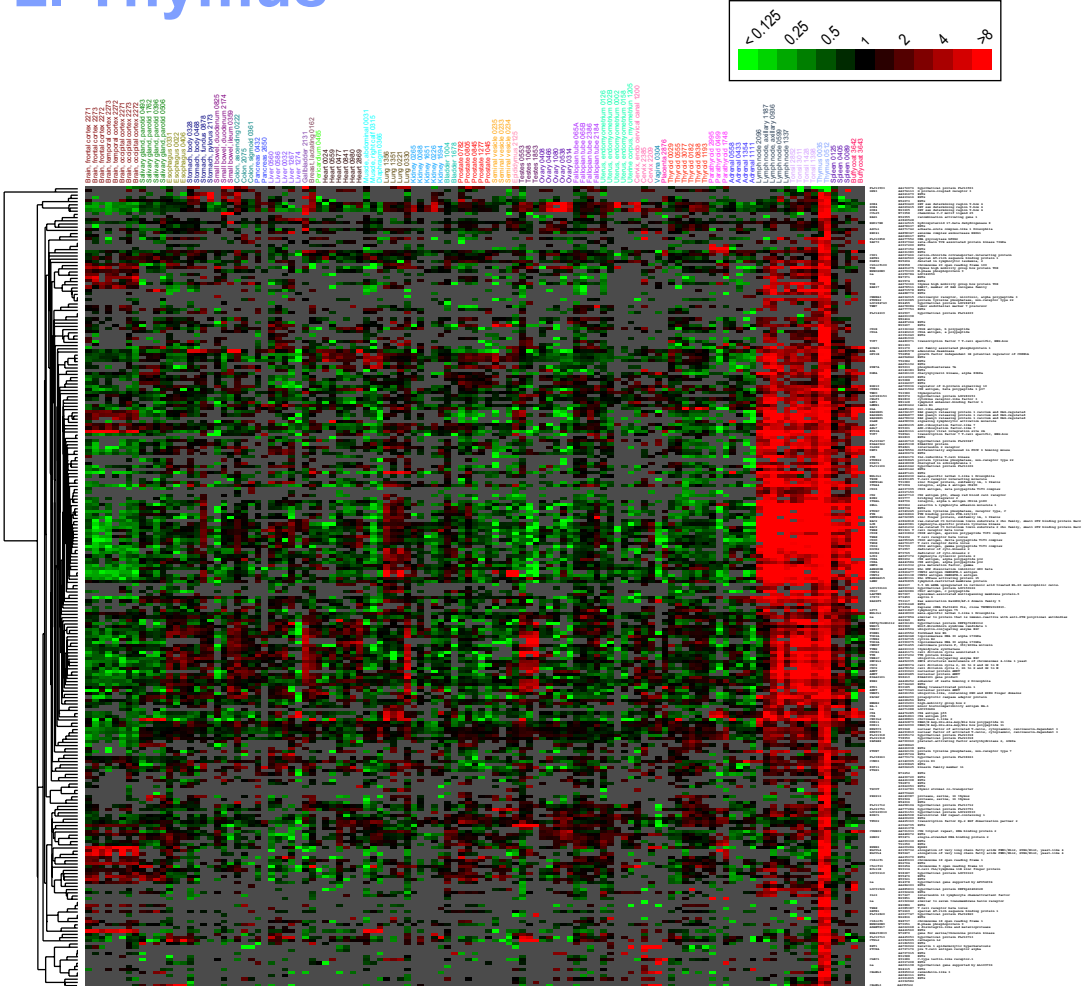



# bb. Buffy coat

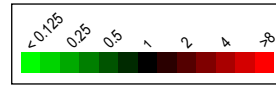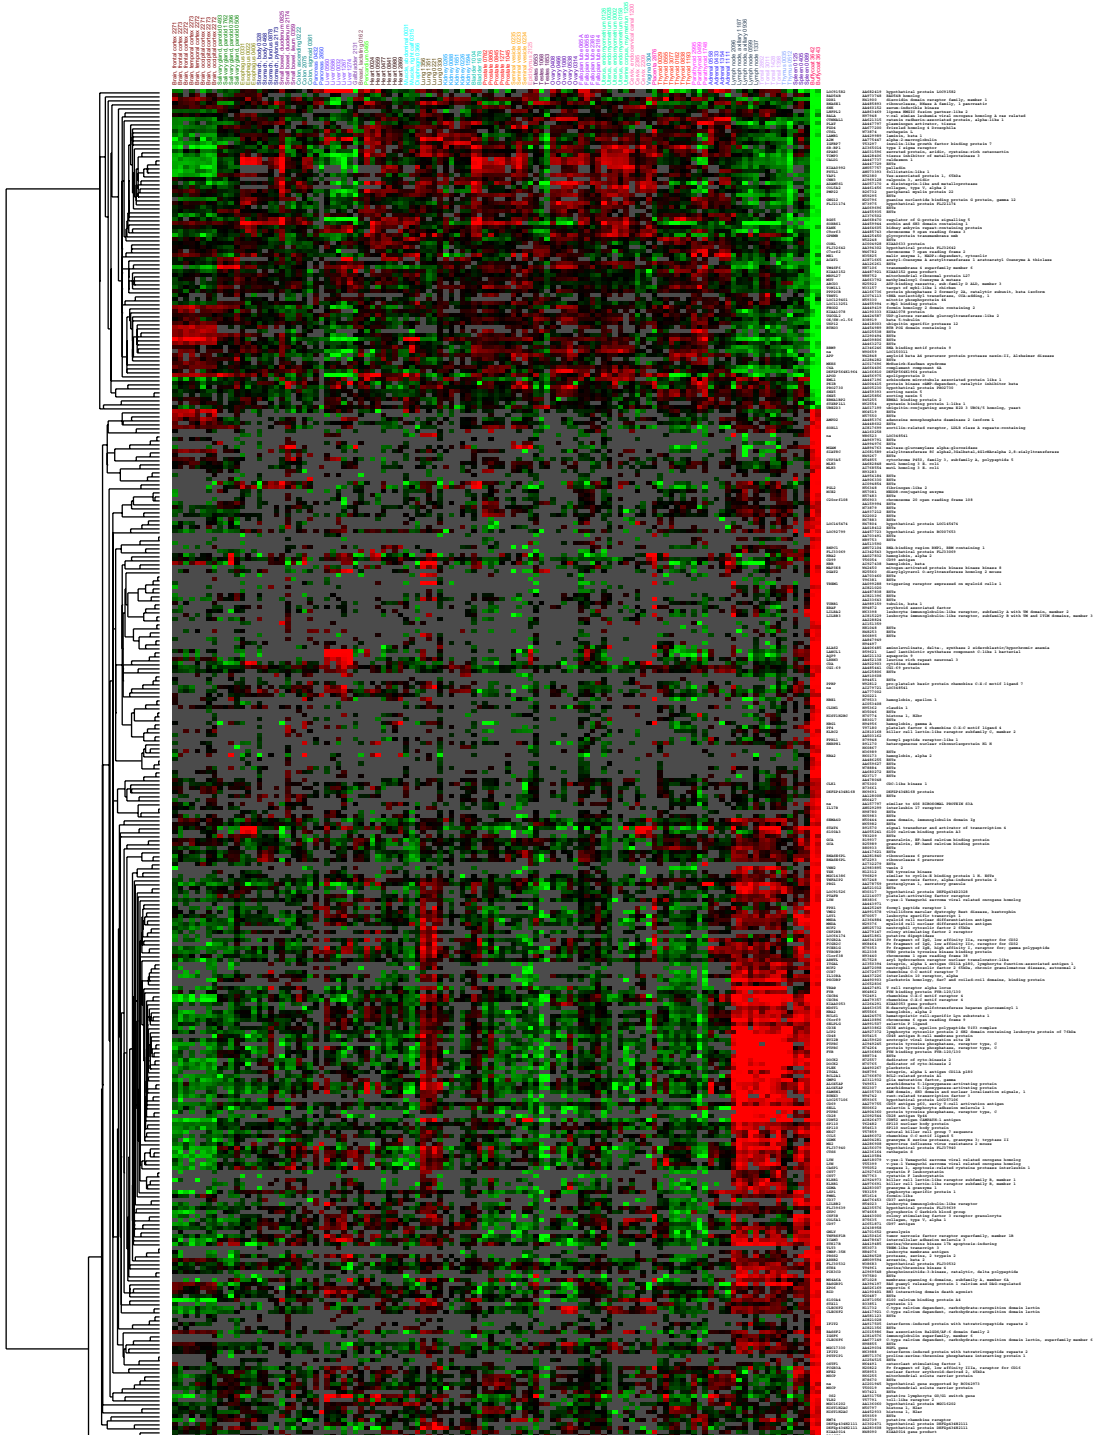

Supplement: gb-2005-6-3-r22-S6.pdf [file gb-2005-6-3-r22-S6.pdf]
