# Supplementary material for: A DNA microarray survey of gene expression in normal human tissues
Source: PubMed Central journal article supplement (PMC1088941; doi:10.1186/gb-2005-6-3-r22), 2005-02-14

# a. Tyrosine kinases

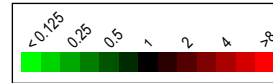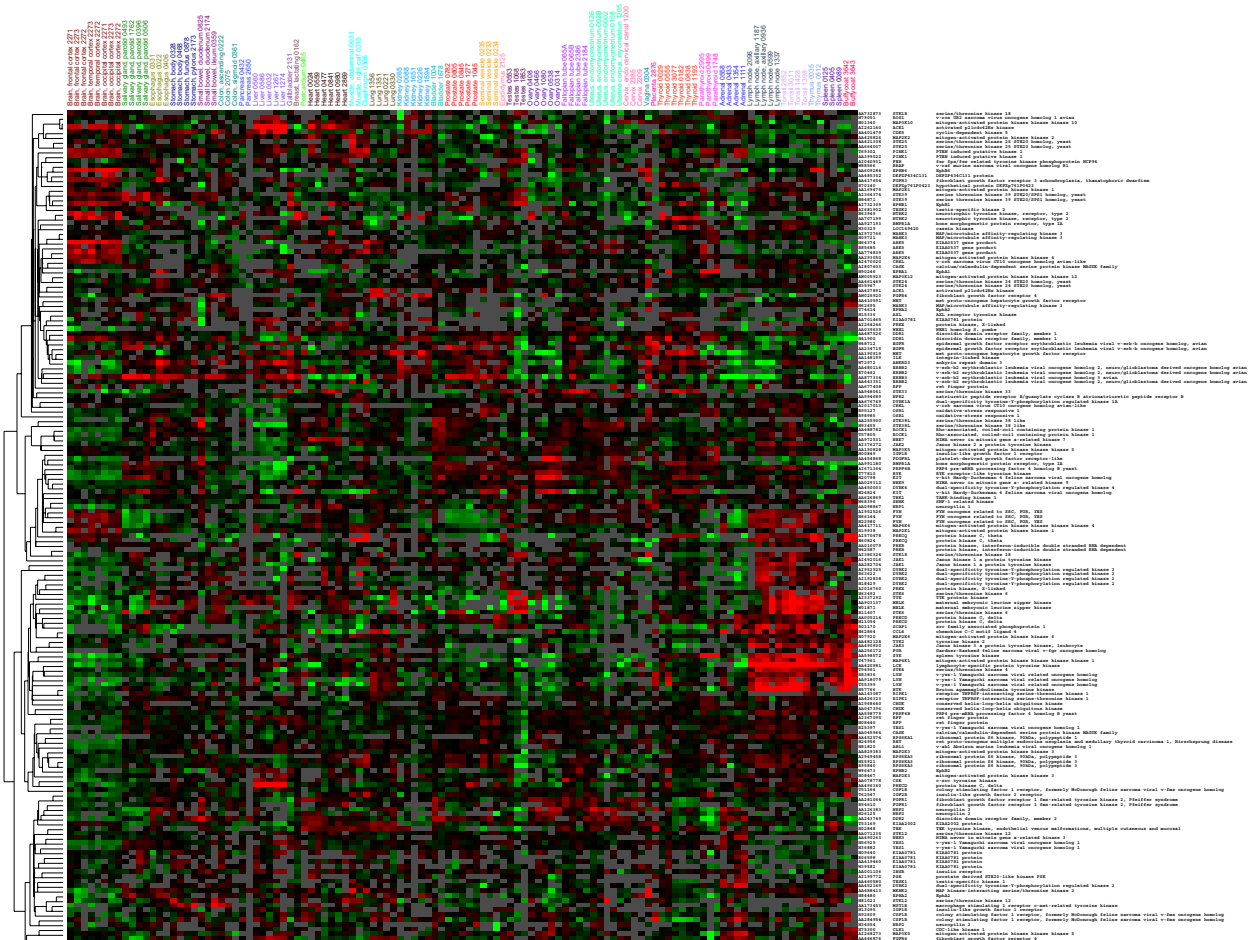

## b. Kinases

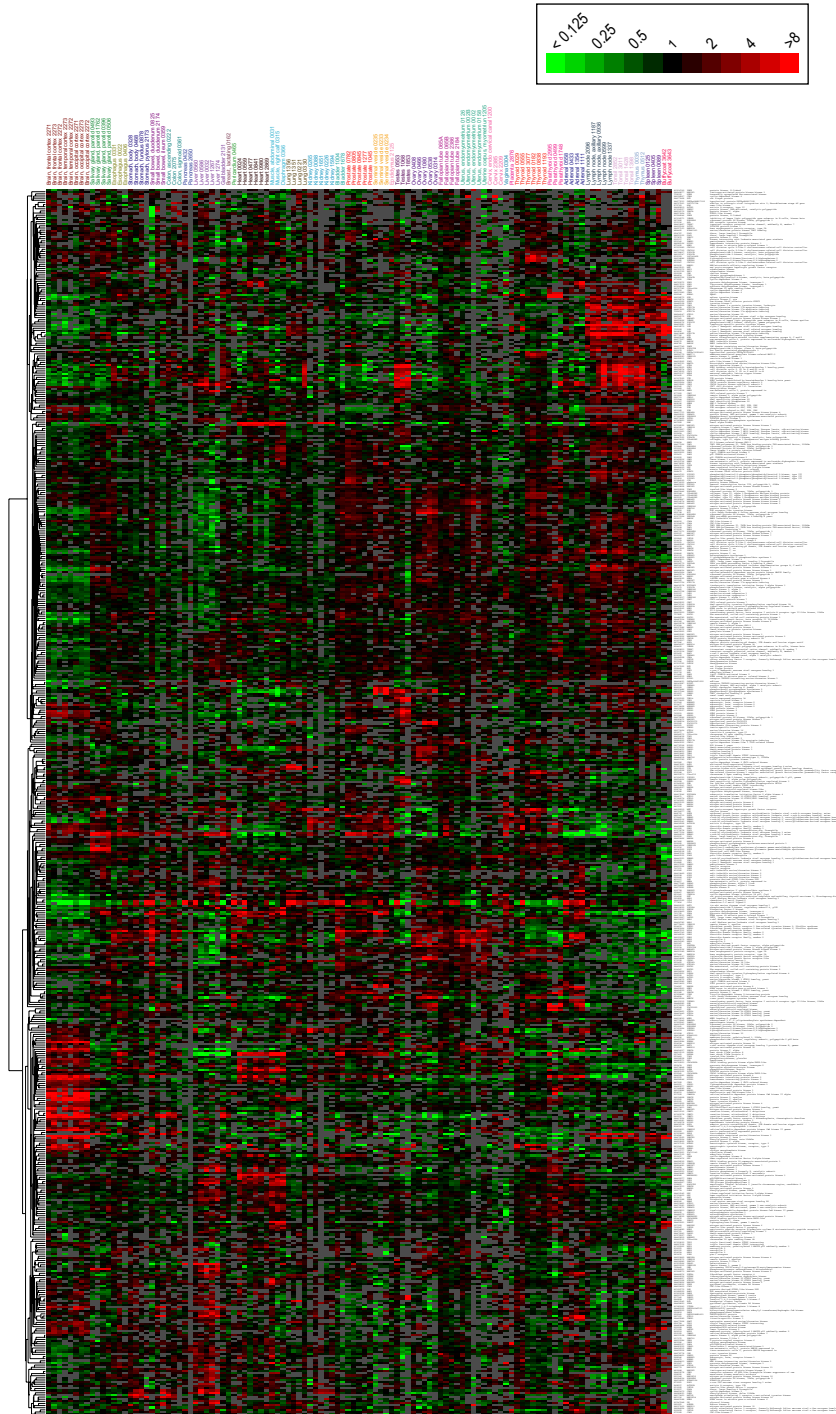



# d. Transcription factors

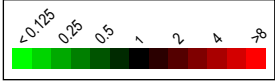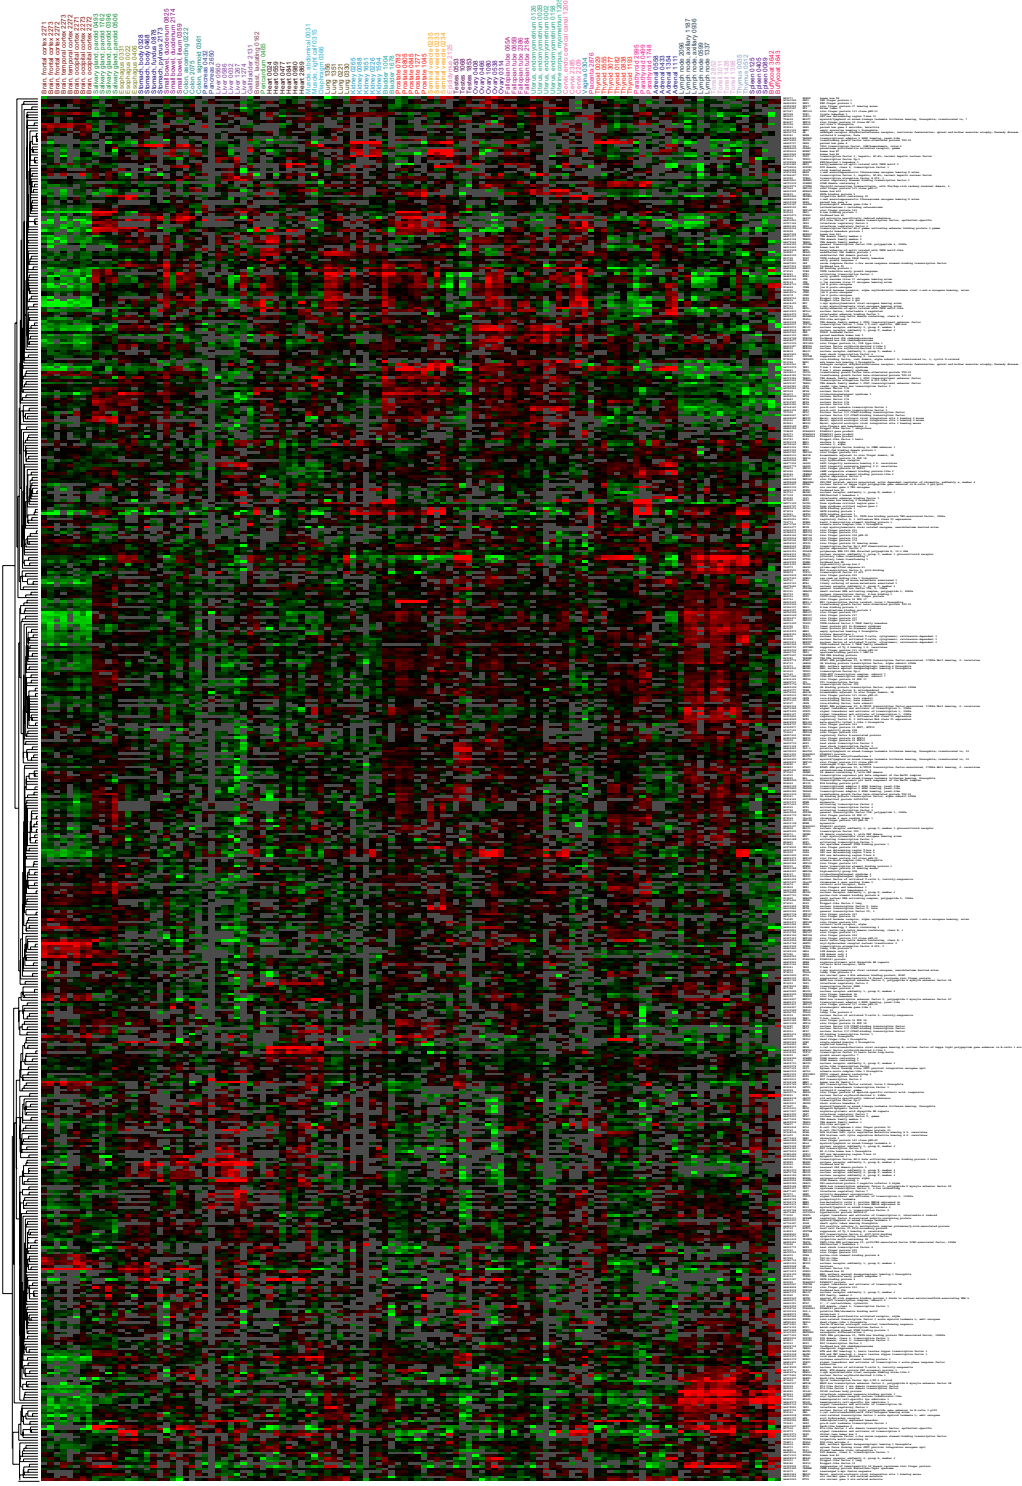

# e. Ion channels

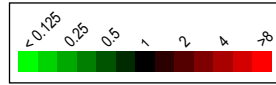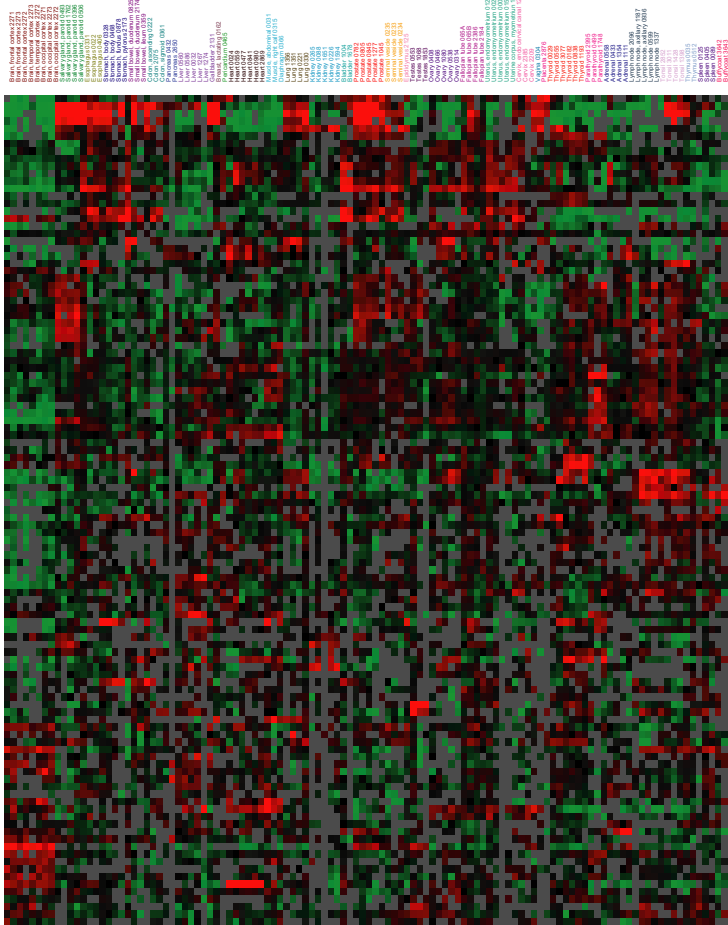

|          |          |                                                                                                        |
|----------|----------|--------------------------------------------------------------------------------------------------------|
| HE3532   | GABRE    | gamma-aminobutyric acid GABA A receptor, epsilon                                                       |
| AI171856 | FXR3     | FXR domain containing ion transport regulator 3                                                        |
| AA033583 | FXR3     | FXR domain containing ion transport regulator 3                                                        |
| AA443773 | FXR3     | FXR domain containing ion transport regulator 3                                                        |
| AA458982 | SCN11A   | sodium channel, nonvoltage-gated 3 alpha                                                               |
| AA126009 | FXR3     | FXR domain containing ion transport regulator 3                                                        |
| NC1154   | KCTD15   | potassium channel tetramerization domain containing 15                                                 |
| AA136165 | KCTD15   | potassium channel tetramerization domain containing 15                                                 |
| HE4211   | PLD2     | phosphatidylinositol 3-kinase-related domain containing 11                                             |
| AA170702 | CLIC4    | chloride intracellular channel 4                                                                       |
| AA142841 | CLIC4    | chloride intracellular channel 4                                                                       |
| AA117861 | CLIC4    | chloride intracellular channel 4                                                                       |
| AA487528 | KCNB3    | sodium channel, voltage-gated, type II, beta                                                           |
| HE1796   | KCTD10   | potassium channel tetramerization domain containing 10                                                 |
| NC1840   | KCTD10   | potassium channel tetramerization domain containing 10                                                 |
| AA029289 | KCNMB1   | potassium large conductance calcium-activated channel gamma-aminobutyric acid GABA A receptor, gamma 2 |
| HE1109   | GABRG2   | potassium large conductance calcium-activated channel gamma-aminobutyric acid GABA A receptor, gamma 2 |
| AA115034 | KCTD12   | potassium channel tetramerization domain containing 12                                                 |
| HE4021   | KCNMB4   | potassium large conductance calcium-activated channel gamma-aminobutyric acid GABA A receptor, gamma 2 |
| AA431182 | SCN7A    | sodium channel, voltage-gated, type VII, alpha                                                         |
| AA136184 | KCNH8    | potassium inwardly-rectifying channel, subfamily J, member 8                                           |
| AA036956 | KCNH8    | potassium inwardly-rectifying channel, subfamily J, member 8                                           |
| AI100647 | KCNH8    | potassium inwardly-rectifying channel, subfamily J, member 8                                           |
| HE1821   | PLD2     | phosphatidylinositol 3-kinase-related domain containing 11                                             |
| AA451865 | CLIC3    | chloride channel, subfamily G, member 1                                                                |
| AI190889 | ATP8V1A  | ATPase, H <sup>+</sup> transporting, lysosomal 70kDa, VI subunit A                                     |
| AI182881 | ATP8V1A  | ATPase, H <sup>+</sup> transporting, lysosomal 70kDa, VI subunit A                                     |
| HE1810   | CLIC3    | chloride channel 3                                                                                     |
| AA459710 | CLIC3    | chloride channel 3                                                                                     |
| AI182114 | CLIC3    | chloride channel 3                                                                                     |
| HE6520   | TPP2     | **inositol 1,4,5-trisphosphate receptor, type 2                                                        |
| AA479093 | TPP2     | **inositol 1,4,5-trisphosphate receptor, type 2                                                        |
| HE3661   | TPP2     | **inositol 1,4,5-trisphosphate receptor, type 2                                                        |
| AA487851 | CUL5     | Cullin 5                                                                                               |
| AA044147 | P2RX5    | purinergic receptor P2X2, ligand-gated ion channel, 5                                                  |
| HE3493   | ORP1     | Aa channel tetramerization protein                                                                     |
| AA460728 | VMC3     | voltage-dependent anion channel 3                                                                      |
| HE1473   | KCNJ7    | potassium inwardly-rectifying channel, subfamily J, member 2                                           |
| AA134384 | CUL5     | Cullin 5                                                                                               |
| AA107436 | ANKA7    | **Ankemin A7                                                                                           |
| HE1810   | ANKA7    | **Ankemin A7                                                                                           |
| AI102813 | TRPM7    | **transient receptor potential cation channel, subfamily M, member 7                                   |
| AI103114 | TRPM7    | **transient receptor potential cation channel, subfamily M, member 7                                   |
| HE1415   | CLIC3    | chloride intracellular channel 3                                                                       |
| HE4813   | VMC2     | voltage-dependent anion channel 2                                                                      |
| AA044059 | VMC2     | voltage-dependent anion channel 2                                                                      |
| HE3822   | KCNJ2    | hyperpolarization-activated cyclic nucleotide-gated potassium channel 1                                |
| AA467172 | TRPA1    | **transient receptor potential cation channel, subfamily A, member 1                                   |
| HE4766   | KCNMB1   | potassium voltage-gated channel, shaker-related subfamily, beta member 1                               |
| AA113094 | KCNMB1   | potassium voltage-gated channel, shaker-related subfamily, beta member 1                               |
| AI111809 | CLIC2    | chloride intracellular channel 2                                                                       |
| HE2201   | CLIC2    | chloride intracellular channel 2                                                                       |
| AI109341 | KCNH3    | potassium voltage-gated channel, shaker-related subfamily, member 3                                    |
| AA144801 | KCNH3    | potassium voltage-gated channel, shaker-related subfamily, member 3                                    |
| AA086475 | CUL5     | Cullin 5                                                                                               |
| AI109341 | KCNH3    | potassium voltage-gated channel, shaker-related subfamily, member 3                                    |
| AA144801 | KCNH3    | potassium voltage-gated channel, shaker-related subfamily, member 3                                    |
| AA101976 | TPP3     | **inositol 1,4,5-trisphosphate receptor, type 3                                                        |
| HE18205  | TPP3     | **inositol 1,4,5-trisphosphate receptor, type 3                                                        |
| AA095093 | NOL4     | nucleolar protein family A, member 1/NACA small nuclear RNAs                                           |
| AA134607 | TRPM7    | **transient receptor potential cation channel, subfamily M, member 7                                   |
| TRP645   | KCTD5    | potassium channel tetramerization domain containing 5                                                  |
| AA17488  | KCTD5    | potassium channel tetramerization domain containing 5                                                  |
| AI168710 | KOHL     | MAP3K cascade 1                                                                                        |
| AI173182 | KCNJ10   | potassium channel, subfamily J, member 10                                                              |
| AA017112 | TRPC1    | transient receptor potential cation channel, subfamily C, member 1                                     |
| HE4063   | GABRB1   | gamma-aminobutyric acid GABA A receptor, beta 1                                                        |
| AI155379 | TRPC1    | transient receptor potential cation channel, subfamily C, member 1                                     |
| AA163116 | TRPA1    | tumor necrosis factor, alpha-induced protein 1, endothelial                                            |
| AA188792 | PLD2     | phosphatidylinositol 3-kinase-related domain containing 11                                             |
| AA447727 | PLI12770 | hypothetical protein FLI2770                                                                           |
| HE1471   | CLIC4    | chloride intracellular channel 4                                                                       |
| W14471   | CNMG1    | cyclic nucleotide-gated channel alpha 1                                                                |
| AA437058 | KCNMB1   | potassium voltage-gated channel, shaker-related subfamily, beta member 1                               |
| AI164871 | ATP8V1B1 | ATPase, H <sup>+</sup> transporting, lysosomal 56/58kDa, VI subunit B, isoform 1                       |
| AA104159 | ATP8V1B1 | ATPase, H <sup>+</sup> transporting, lysosomal 56/58kDa, VI subunit B, isoform 1                       |
| AA023671 | SLC9A5   | solute carrier family 9 sodium/hydrogen exchanger, isoform 2                                           |
| HE9727   | CLIC5    | chloride channel 5/superoxide channel 2, X-linked, Dent disease                                        |
| HE6443   | KCNMB1   | **calcium channel, voltage-dependent, alpha 1B subunit                                                 |
| AI140031 | TRPA1    | **transient receptor potential cation channel, subfamily A, member 1                                   |
| AI150825 | KCNH1    | potassium voltage-gated channel, Shal-related subfamily, member 1                                      |
| HE1818   | CLIC6    | chloride channel 6                                                                                     |
| AA431192 | TPP1     | transmembrane phosphatase with tannin homology                                                         |
| AI107102 | KCNH4    | potassium voltage-gated channel, Shal-related subfamily, member 4                                      |
| AI121776 | KCNH1    | potassium channel, subfamily H, member 1                                                               |
| HE2620   | KCNH1    | potassium channel, subfamily H, member 1                                                               |
| HE4848   | AP3L     | apical protein-like domain family 1                                                                    |
| HE2926   | CACNA1D  | calcium channel, voltage-dependent, L type, alpha 1D subunit                                           |
| AI14383  | KCNMB2   | potassium voltage-gated channel, Shal-related subfamily, member 2                                      |
| HE4334   | GABRA2   | gamma-aminobutyric acid GABA A receptor, alpha 2                                                       |
| HE1710   | GABRA2   | gamma-aminobutyric acid GABA A receptor, alpha 2                                                       |
| HE2765   | KCNMB1   | potassium voltage-gated channel, Shal-related subfamily, member 1                                      |
| AA159316 | CLIC4    | chloride channel 4                                                                                     |
| AA443074 | TRPM40   | translocase of outer mitochondrial membrane 40 homolog yeast                                           |
| HE1514   | GRIN2C   | glutamate receptor, ionotropic, N-methyl D-aspartate 2C                                                |
| HE3103   | SCN1B    | sodium channel, voltage-gated, type I, beta                                                            |
| HE1736   | FXR3     | FXR domain containing ion transport regulator 1 phospholeman                                           |
| HE1826   | CACNB3   | calcium channel, voltage-dependent, beta 3 subunit                                                     |
| HE1820   | CLIC4    | chloride channel 4/superoxide channel 2, X-linked, Dent disease                                        |
| AA118500 | CLIC4    | chloride channel 4/superoxide channel 2, X-linked, Dent disease                                        |
| HE1834   | TRPM21   | transmembrane 4 superfamily member 11/plasminogen                                                      |
| AA176716 | GABRA1   | gamma-aminobutyric acid GABA A receptor, alpha 1                                                       |
| HE1801   | SLC9A6   | solute carrier family 9 sodium/hydrogen exchanger, isoform 6                                           |
| HE1376   | KCNH4    | potassium voltage-gated channel, Shal-related subfamily, member 4                                      |
| HE1768   | KCNQ3    | potassium voltage-gated channel, KCQ-like subfamily, member 3                                          |
| AI107388 | ACCE1    | acidic-sensitive cation channel 2, neuronal                                                            |
| HE1791   | TRP2     | transient receptor 2 cardiac                                                                           |
| HE1854   | KCNQ3    | potassium voltage-gated channel, KCQ-like subfamily, member 3                                          |
| AA093385 | SLC9A9   | solute carrier family 9 sodium/hydrogen exchanger, isoform 9                                           |
| AA481319 | KCTD11   | potassium channel tetramerization domain containing 11                                                 |
| HE4371   | KCTD2    | potassium channel tetramerization domain containing 2                                                  |
| HE1813   | KCNH1    | potassium voltage-gated channel, Shal-related subfamily, member 1                                      |

# f. Extracellular matrix

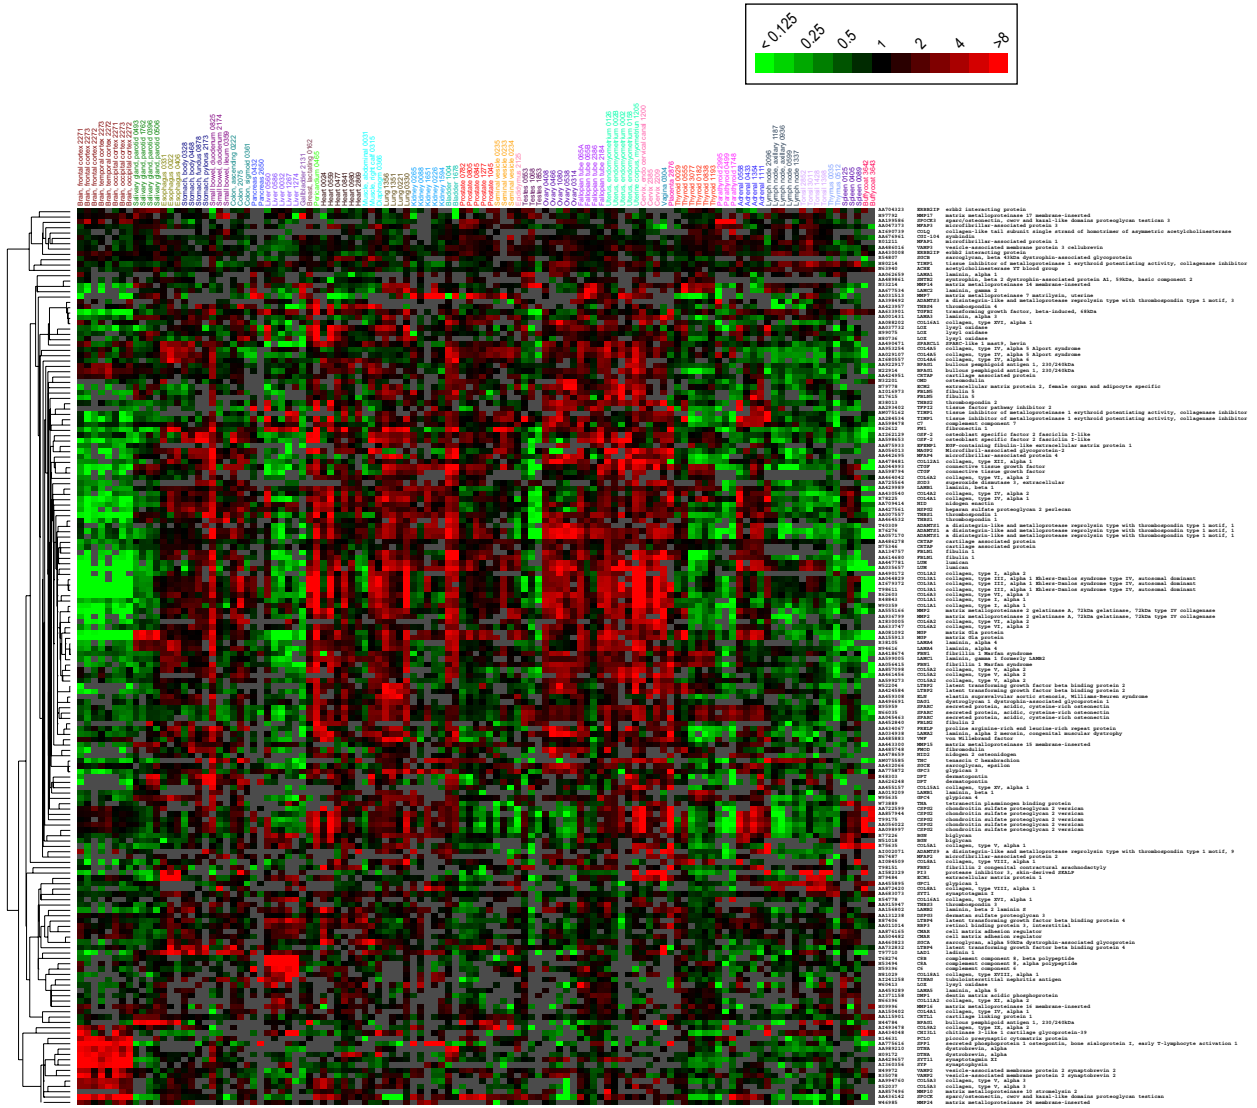

# g. Cell adhesion

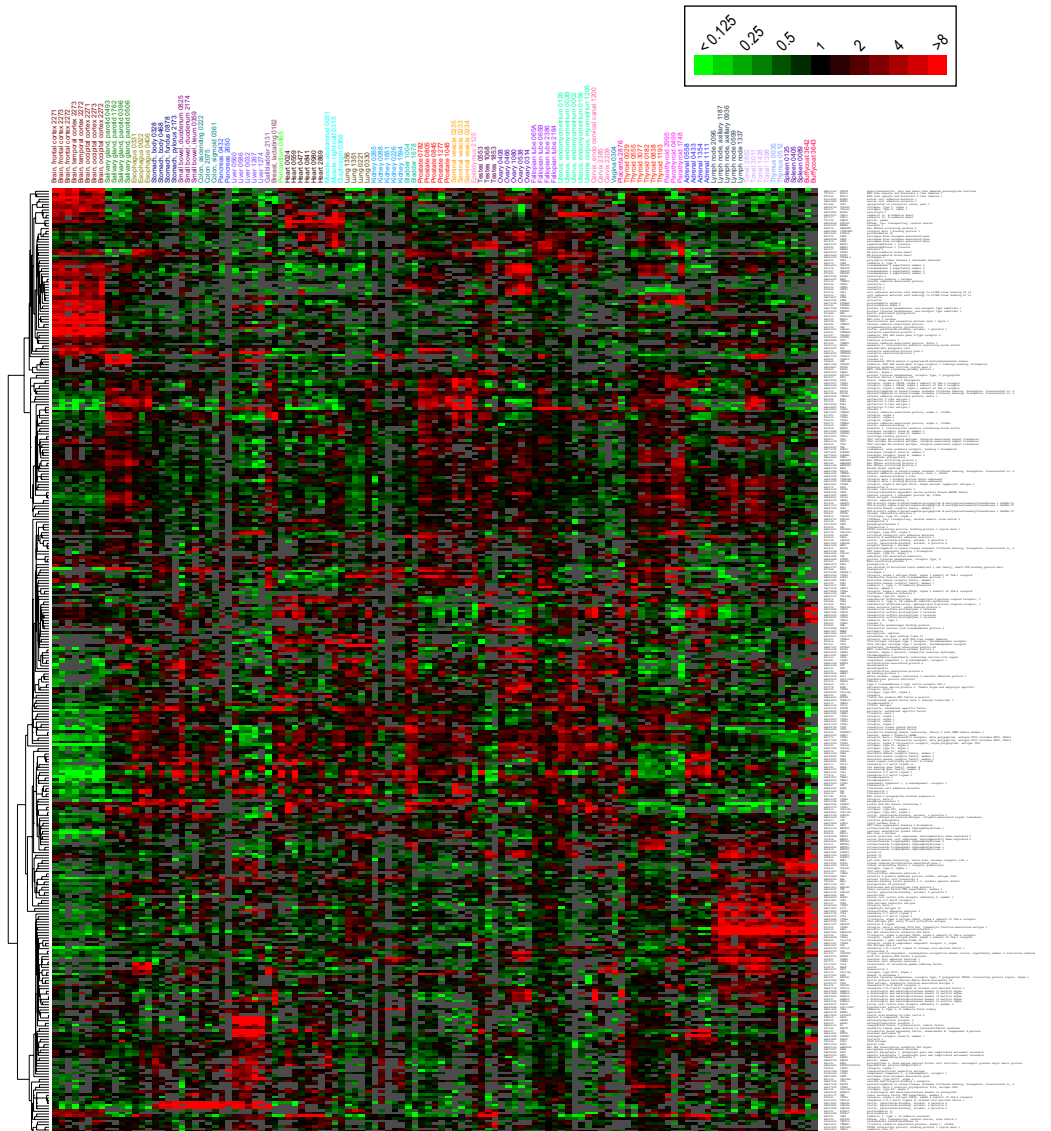

Supplement: gb-2005-6-3-r22-S7.pdf [file gb-2005-6-3-r22-S7.pdf]
