# Supplementary material for: A DNA microarray survey of gene expression in normal human tissues
Source: PubMed Central journal article supplement (PMC1088941; doi:10.1186/gb-2005-6-3-r22), 2005-02-14

# b. Salivary gland

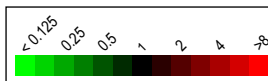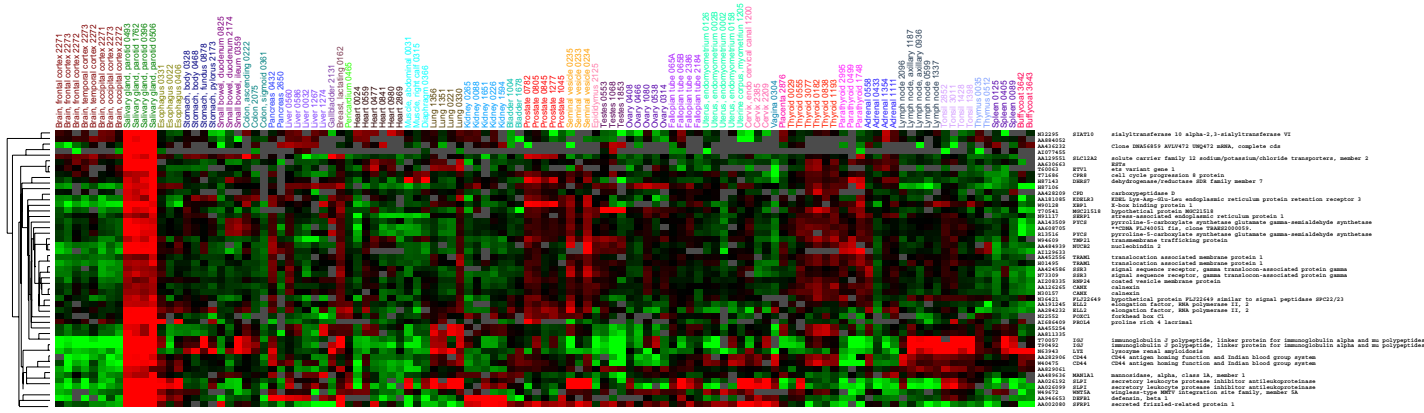

# c. Esophagus

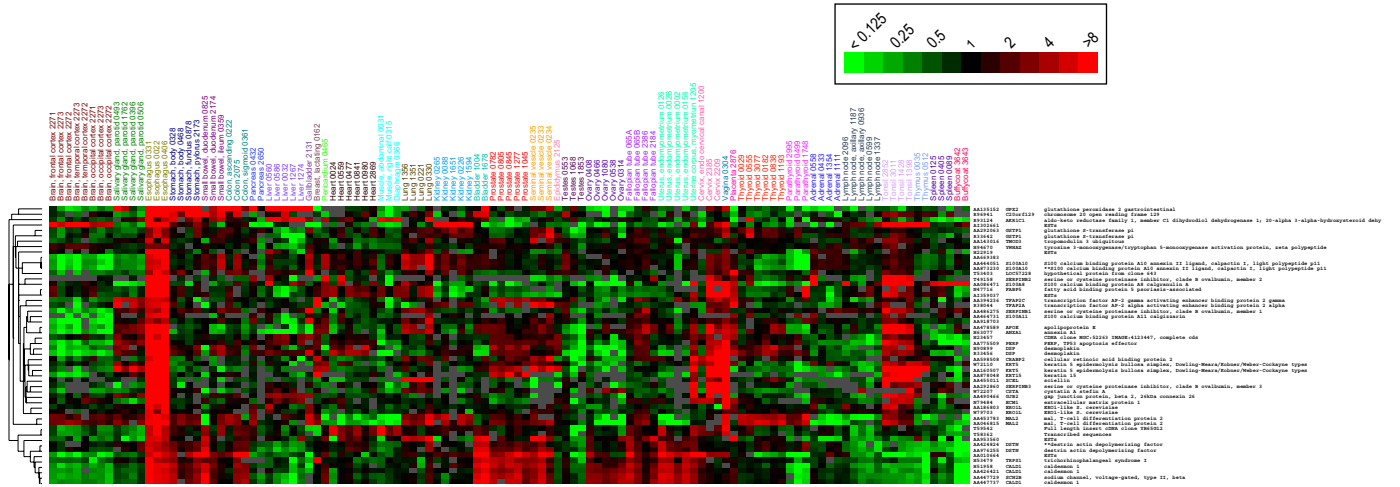





# f. Colon

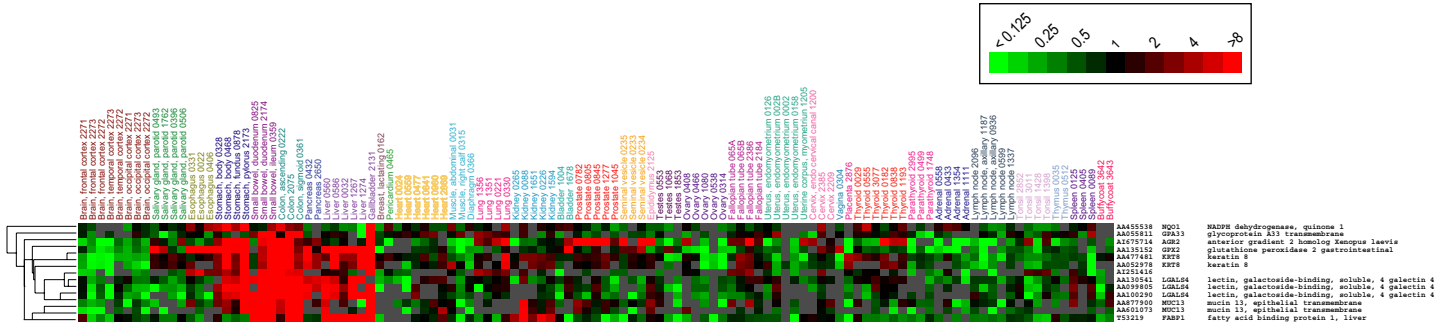



# h. Liver

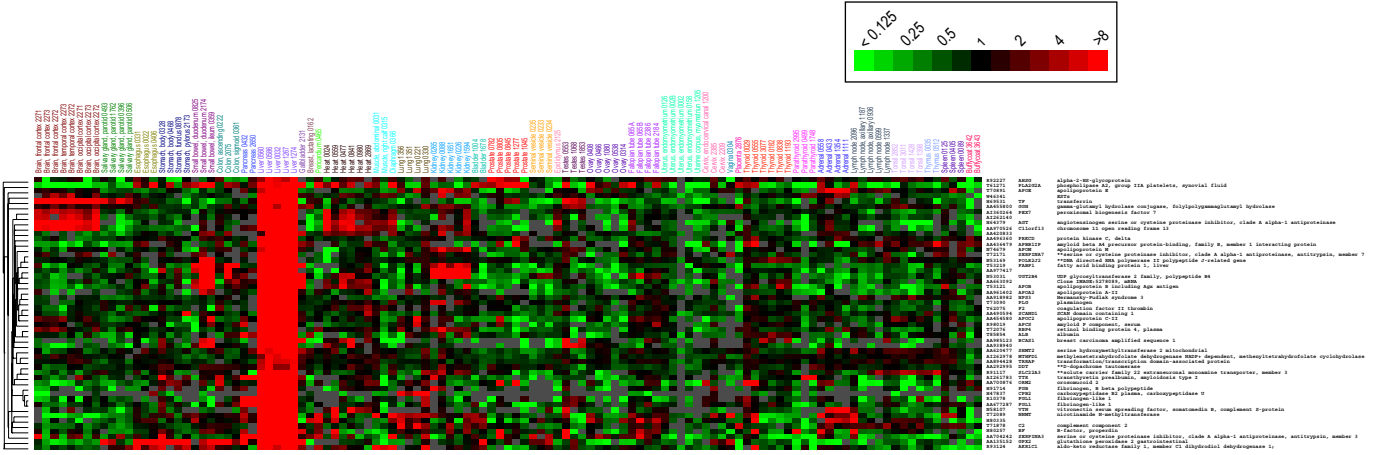







# k. Lung

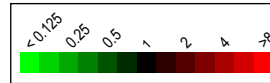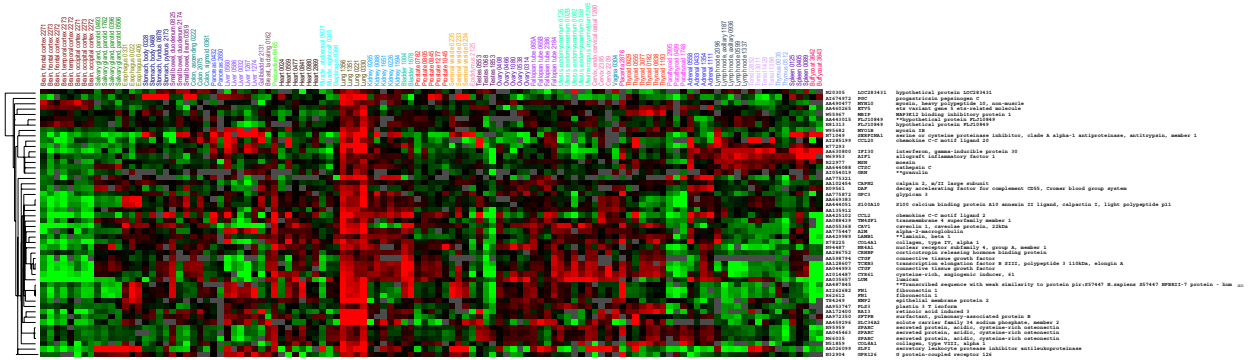

# I. Kidney

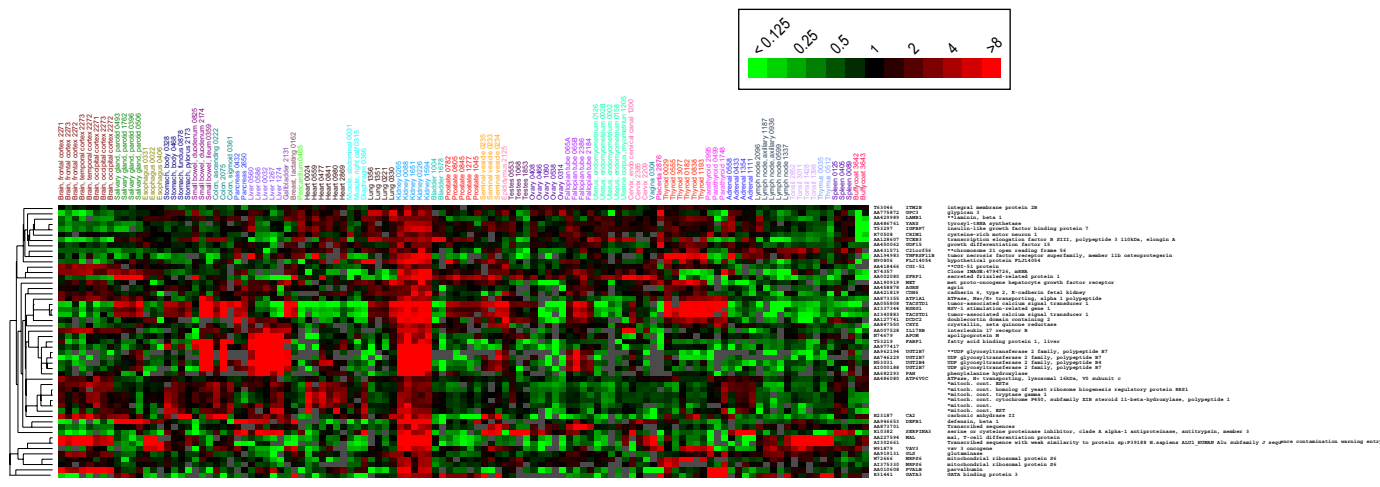

# m. Bladder

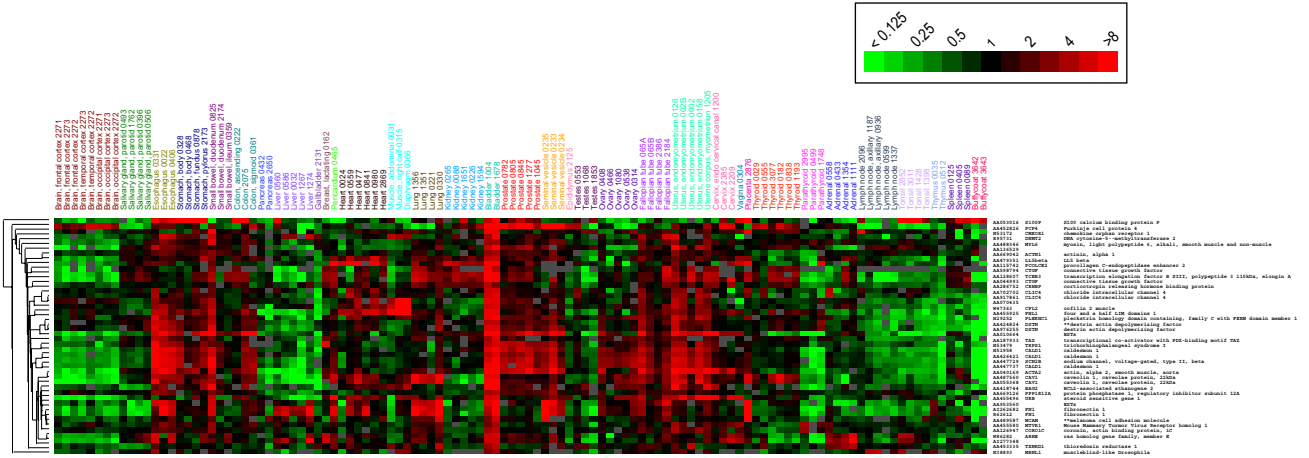

# n. Prostate

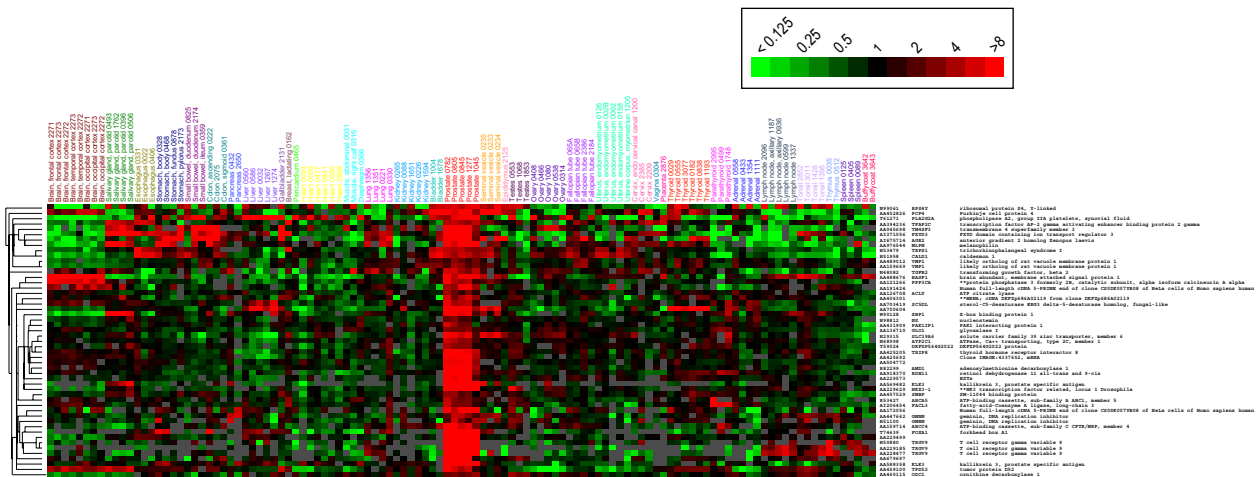

# o. Seminal vesicle

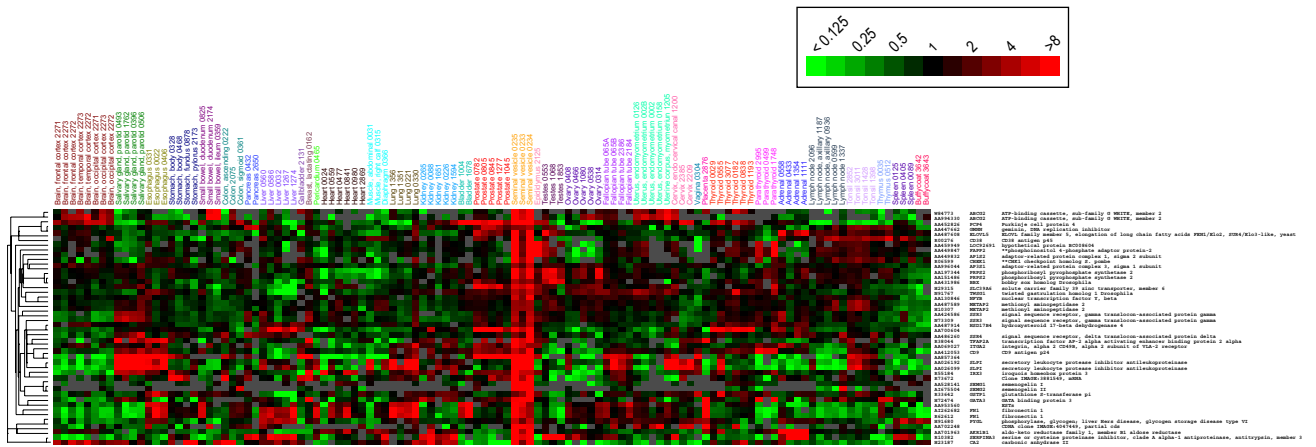





# q. Ovary

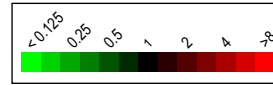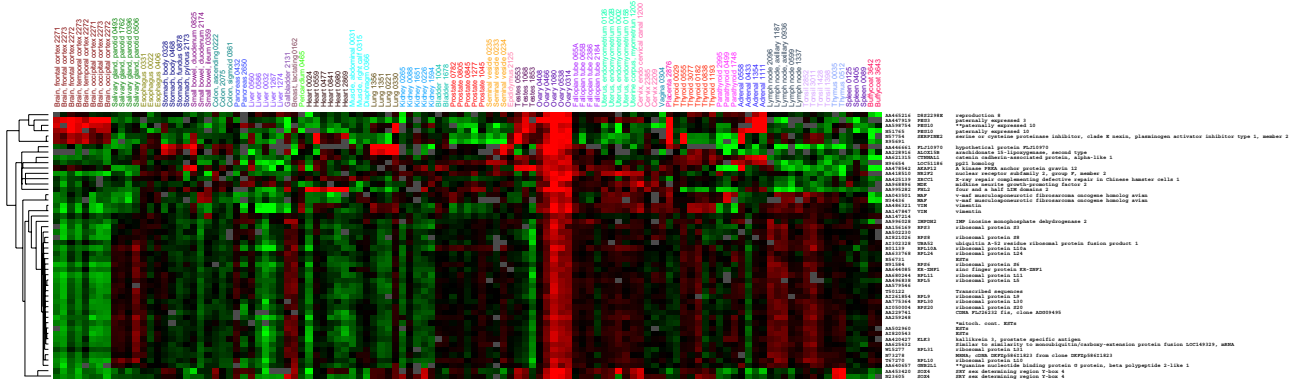





# t. Cervix

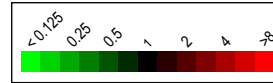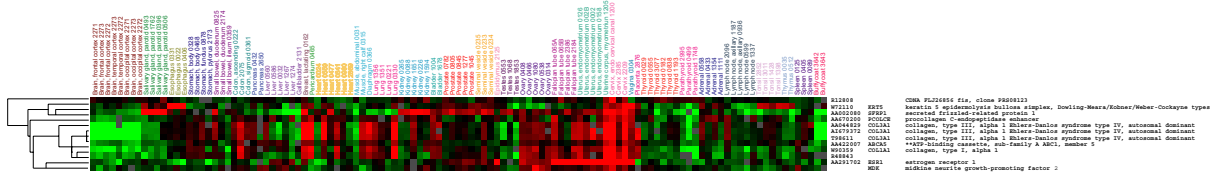







# x. Lymph node

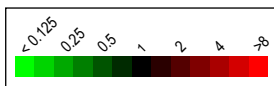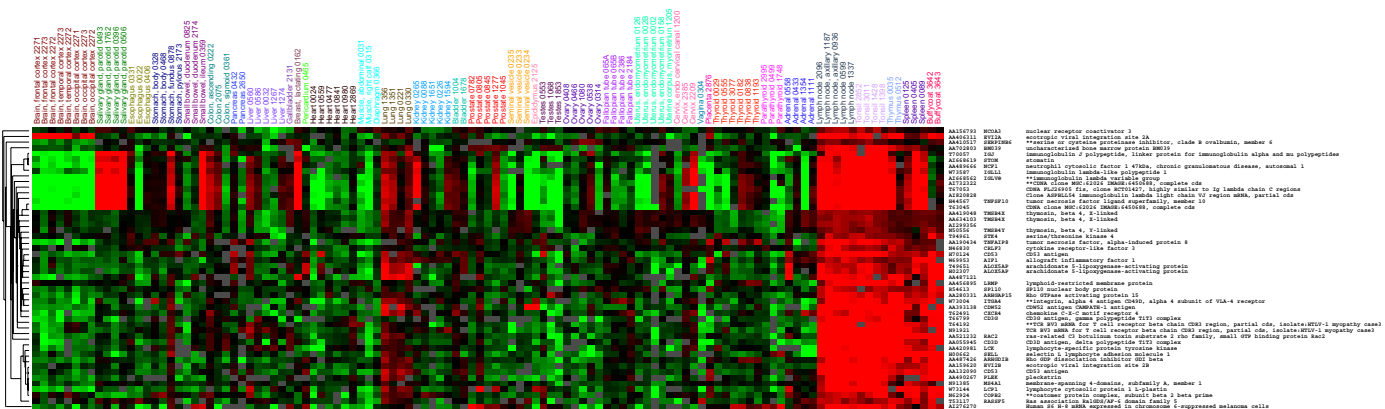



# y. Tonsil

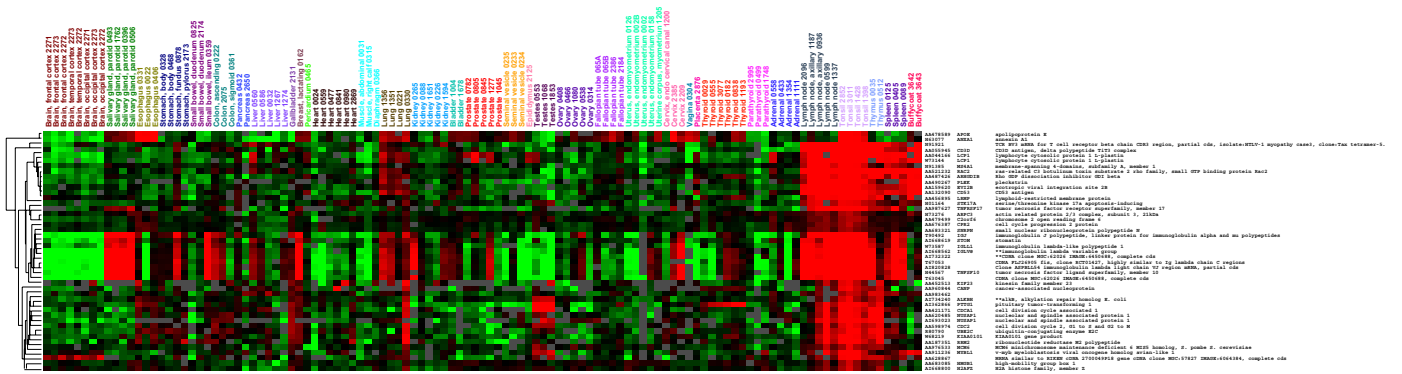

# z. Thymus

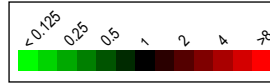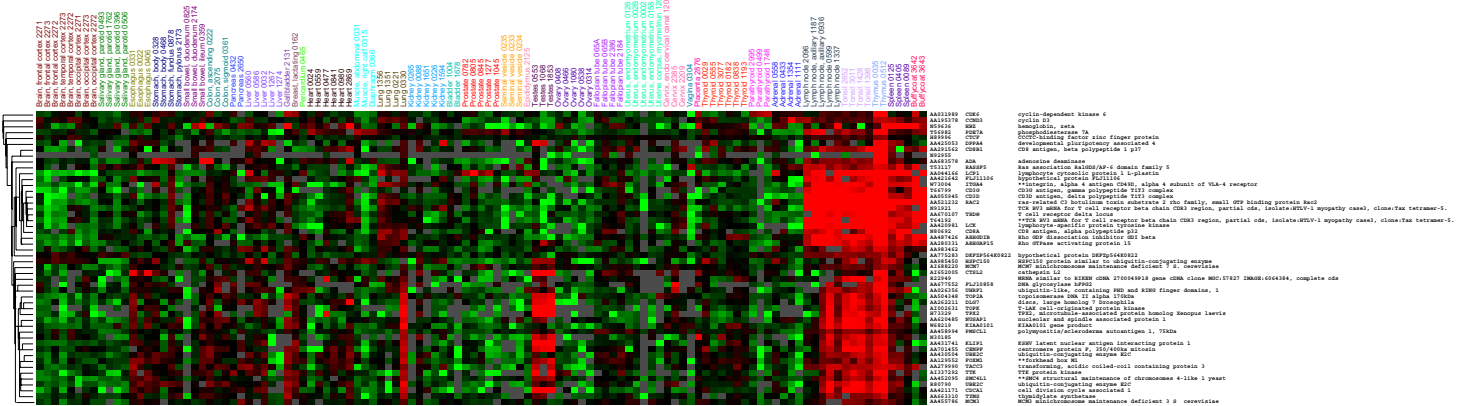

# aa. Spleen

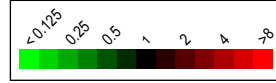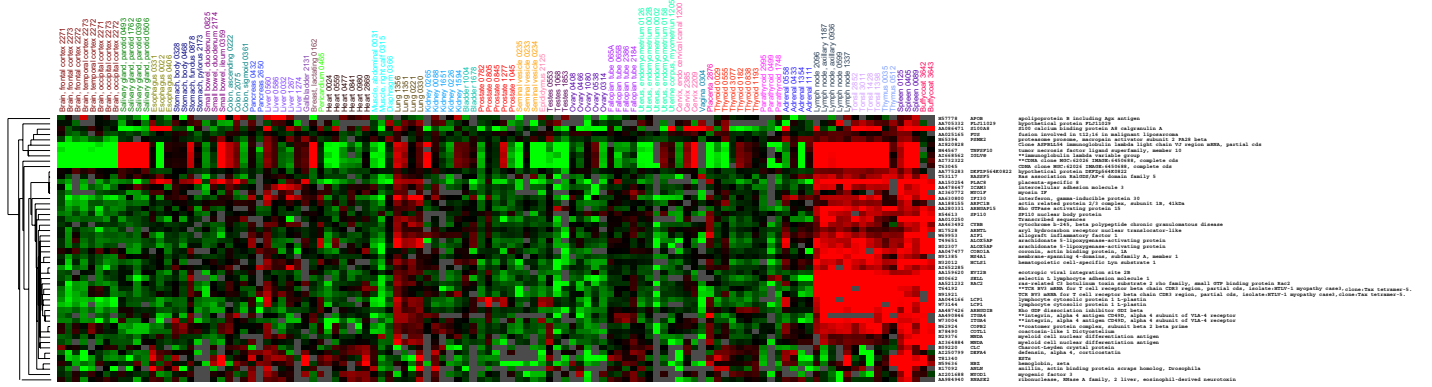

Supplement: gb-2005-6-3-r22-S8.pdf [file gb-2005-6-3-r22-S8.pdf]
